# Supplementary material for: Exosomes derived from Fusobacterium nucleatum -infected colorectal cancer cells facilitate tumour metastasis by selectively carrying miR-1246/92b-3p/27a-3p and CXCL16
Source: HighWire-hosted journal article supplement (doi:10.1136/gutjnl-2020-321187), 2020-11-10
Supplement: gutjnl-2020-321187supp001_data_supplement.pdf [file gutjnl-2020-321187supp001_data_supplement.pdf]

**Exosomes derived from *Fusobacterium nucleatum*-infected colorectal cancer cells facilitate tumor metastasis by selectively carrying miR-1246/92b-3p/27a-3p and CXCL16**

Songhe Guo, Jun Chen, Fangfang Chen, Qiuyao Zeng, Wanli Liu, Ge Zhang

**Supplementary Information**

## Materials and Methods

### Patients and samples

The serum and stool samples from 82 patients with primary CRC were selected from an archive of blood samples at the Cancer Center of Sun Yat-sen University (SYSUCC). Ethics approval was granted by the Ethics Committee of SYSUCC. In addition, healthy blood samples were obtained from 102 subjects without any malignancy. All experiments were carried out in accordance with the approved guidelines and related regulations.

### Bacterial culture

*Fn* ATCC 25586 was purchased from the Institute of Microbiology of Chinese Academy of Sciences. *Fn* was grown anaerobically at 37 °C for 48 h in brain heart infusion broth (BHI, Oxoid, UK). Heat-killed (dead) *Fn* was made by heating at 100 °C for 10 min. *E. coli* (DH5 $\alpha$ ; Tiangen, China) was cultured aerobically at 37°C for 24 h in an LB agar plate. Bacteria were centrifuged and then suspended to a concentration of 1 $\times$ 10<sup>8</sup> colony-forming units (CFUs)/ml with RPMI 1640 (Gibco, USA) for the infection experiment.

### Cell culture

The human CRC cell lines HCT116 and SW480 and the mouse CRC cell line CT26 were cultured in the recommended medium supplemented with 10% fetal bovine serum (FBS, Gibco, USA) in a humidified incubator at 37°C with 5% CO<sub>2</sub>.

### **Exosome isolation, characterization and nanoparticle tracking analysis**

Exosomes were isolated by differential centrifugation. Briefly, the cell supernatant was centrifuged at 16,500 g for 20 min and then passed through a 0.22 µm filter. Then, the filtered supernatant was subjected to ultracentrifugation at 120,000 g for 70 min at 4°C and the exosomal pellet was resuspended in PBS to produce exosome-enriched fractions. Serum samples (2 ml) from CRC patients and healthy subjects (HS) were collected from the same volume serum as a quantitative indicator of exosome and diluted eight-fold with PBS and the exosome-enriched fractions were prepared as described above. The exosome size and number were measured by a nanoparticle tracking analysis (NTA) using a Zetasizer Nano S90 system (Malvern Instruments, England) equipped with a blue laser (405 nm). The movement under Brownian motion was recorded in 9 s sample videos which were analyzed with NTA analytical software (version 2.2). Purified exosomes were observed with a JEM1400 transmission electron microscope (TEM) operated at 120 kV (JEOL, Japan) and photographs were captured with a Canon A650 digital camera.

### **PKH26 staining for exosomes**

Exosomes were labeled using PKH26 red fluorescent cell linker kits (Sigma, USA) according to the manufacturer's instructions. Briefly, exosomes were resuspended in 100 µl of Diluent C. Then, 5 µM PKH26 dye was added, which was followed by 15 min of incubation at room temperature in the dark. The staining was stopped by adding 200 µl of bovine serum and incubating for 1 min. The stained exosomes were evaluated by CLSM (OLYMPUS-FV3000, Japan).

### **miRNA library construction and sequencing**

Total RNA from exosomes was used for miRNA library preparation and sequencing. Library preparation and sequencing were conducted by Guangzhou RiboBio Co., Ltd. Briefly, total RNA samples were separated on a 15% Tris-borate-EDTA (TBE) polyacrylamide gel (Invitrogen, USA) and small RNAs ranging between 18 and 30 nucleotides (nt) were used for library preparation. Small RNAs were reverse transcribed and amplified by PCR. The PCR products were sequenced using an Illumina HiSeq 2500 platform (Illumina, USA).

### **RNA isolation and quantitative RT-PCR**

Total RNA from exosomes was extracted using a total exosome RNA and protein isolation kit (Thermo Fisher Scientific, USA) according to the instructions of the manufacturer. cDNA was synthesized using PrimeScript™ RT Master Mix (TaKaRa, Japan). Quantification of miRNA expression was performed using a Mir-X™ miRNA RT-qPCR TB Green™ Kit (TaKaRa, Japan) on a Light Cycler® 480 II (Roche, Applied Science). The data were normalized to U6 small nuclear RNA expression and was calculated as  $2^{-\Delta\Delta CT}$  expression.

### **Cell proliferation assay**

Cells were seeded into 96-well plates at a density of 3,000 cells/well and cocultured with PBS, Ex, Ec-Ex or Fn-Ex at a concentration of 10 µg/ml. Cells were incubated at

37 °C in an incubator supplied with 5% CO<sub>2</sub> for 0, 24, 48 and 72 h. Cell Counting kit-8 (CCK8; Sigma) assays were performed according to the manufacturer's protocol. Finally, the absorbance of each sample was detected at a wavelength of 450 nm using a plate reader (Bio-Rad, USA).

### **miRNA transfection**

Cells were transfected with miR-1246/27a-3p/92a-3p mimics, inhibitors, or negative control (NC) chemical synthesis oligonucleotides (Gene Pharma, China) at a final concentration of 50 nM using Lipofectamine 3000 reagent (Invitrogen, USA) at the indicated concentrations according to the supplier's instructions.

### **Stool sample DNA extraction and bacterial quantification**

DNA was extracted using a TIANamp Stool DNA Kit (Tiangen, China) according to the manufacturer's instructions and was stored at -20 °C prior to amplification steps. The quantification of Fn was performed as described previously.<sup>1</sup>

### **miRNA target prediction and luciferase activity assay**

miRNA target prediction and analysis were performed with the algorithms from TargetScan ([http://www.targetscan.org/vert\\_72/](http://www.targetscan.org/vert_72/)), PicTar (<https://pictar.mdc-berlin.de/>), and miRanda (<http://miranda.org.uk/>). Wild-type GSK3β-3'untranslated regions (UTRs) or GSK3β-3'UTRs with various miRNA-binding site mutations were placed in a pmirGLO vector (Gene Pharma, China).

Luciferase reporter assays were performed using a dual-specific luciferase assay kit (Promega, USA) according to the manufacturer's protocol. The reporters were transfected into cells using Lipofectamine 3000 (Invitrogen, USA). The relative expression of firefly luciferase activity was normalized to Renilla luciferase activity.

### **GSK3 $\beta$ overexpression and knockdown**

To generate GSK3 $\beta$  overexpression cells, cells were transfected with pcDNA3.1-GSK3 $\beta$  or pcDNA3.1 vector control using Lipofectamine 3000 reagent (Invitrogen, USA). For GSK3 $\beta$  knockdown, cells were transfected with si-GSK3 $\beta$  RNA (si-GSK3 $\beta$ , sense: 5'-CCACTCAAGAAGTGTCAAGTA-3'; anti-sense: 5'-UUCUCCGAACGUGUCACGUTT-3', GenePharma, China) at a working concentration of 50 nM using Lipofectamine 3000 reagent (Invitrogen, USA).

### **Wound healing assay**

Cells were seeded in 60-mm dishes to create a confluent monolayer. The cell monolayer was then scraped with a p200 pipette tip in a straight line to create a "scratch". After the first image of the scratch was acquired, cells were cocultured with Ex (10  $\mu$ g/ml), Ec-Ex (10  $\mu$ g/ml), Fn-Ex (10  $\mu$ g/ml), CXCL16 (20 ng/ml, Sinobiological, China), or Fn-Ex (10  $\mu$ g/ml) and CXCR6 (10 ng/ml, Sinobiological, China) for 48 h prior to acquisition of the second image. The percent wound closure (%) = migrated cell surface area/total surface area  $\times$ 100.

### **Transwell migration assay**

The effect of exosomes on the migration of cancer cells was determined by using Transwell 24-well plates (8- $\mu$ m pores; Corning). Ex (10  $\mu$ g/ml), Ec-Ex (10  $\mu$ g/ml), Fn-Ex (10  $\mu$ g/ml), CXCL16 (20 ng/ml, Sinobiological, China), or Fn-Ex (10  $\mu$ g/ml) and CXCR6 (10 ng/ml, Sinobiological, China) were added to the bottom chambers to act as chemoattractants. Cells across pores were fixed with 4% paraformaldehyde and stained with 1% crystal violet solution. For each chamber, three fields were randomly chosen and cells were counted.

### **Western blotting**

Cellular and exosomal proteins were separated by 12% SDS-PAGE, transferred to polyvinylidene difluoride membranes, and probed with antibodies against GSK3 $\beta$  and IL8 (1:1,000, BOSTER), CXCL16 and RhoA (1:2,000, BOSTER),  $\beta$ -Catenin and E-cadherin (1:2,000, Abcam), C-Myc, Vimentin and CyclinD1 (1:1,000, CST). Horseradish peroxidase (HRP)-conjugated anti-rabbit or anti-mouse antibodies (1:1,000, BOSTER) were used as secondary antibodies. GAPDH/ $\beta$ -Tubulin protein levels were determined by using the specific antibodies (1:5,000, BOSTER), and their levels were used as a loading control for samples, CD9 and CD63 (1:1,000, Abcam) antibodies were used as markers for exosomes.

### **Protein analysis**

#### **a. Sample preparation for proteomic analysis**

Exosome-protein pellets were re-suspended in digestion buffer (8 M urea, 100 mM Tris-HCl; pH 8.5). The mixture was brought to 5 mM Tris [2-carboxyethyl] phosphine (TCEP) and incubated at room temperature (RT) for 15 min. Iodoacetamide was then added to a final concentration of 10 mM and the resultant mixture was incubated at RT for 20 min in the dark, when Lys-C was added at 1:50 (enzyme to substrate ratio) followed by incubation at 37 °C for 4 h. The digest was then diluted to achieve a final concentration of 2 M urea with 100 mM Tris-HCl; pH 8.5 and trypsin digestion (1:50 protease to protein ratio) was carried out at 37 °C overnight. Protein digestion was stopped by the addition of formic acid at 4% final concentration.

#### **b. Nano-LC–MS/MS analysis of proteins**

Analysis by Nano LC-Q Exactive Plus (Thermo Fisher). The injection volume was 10 µl, and the flow rate was 500 nl/min. The mobile phases consisted of 0.5% acetic acid (A) and 0.5% acetic acid and 80% acetonitrile (B). A three-step linear gradient of 5–10% B in 5 min, 10–40% B in 60 min, 40–100% B in 5 min, and 100% B for 10 min was used. A spray voltage of 2400 V was applied *via* the metal connector. The MS was operated in data-dependent MS/MS mode in which each full MS scan was collected in the orbitrap, precursor ion range of 300–1600 m/z ( $R = 6000 @ 400 \text{ m/z}$ ), followed by up to eight MS/MS scans performed in the linear ion trap where the most abundant peptide molecular ions were selected for collision-induced dissociation (CID), using a normalized collision energy of 35%.

#### **c. Database searches**



Data from the first set of samples was searched against the human proteome (Uniprot) with no enzyme constraint, methionine oxidation as variable modification, using average mass with a peptide tolerance of 1.4 Da and a MS/MS tolerance of 0.5 Da using Mascot (v2.4.0, Matrix Science Ltd.). Filtering the data was performed using Scaffold (version 4.2.0, Proteome Software Inc., Portland, OR). Peptide identifications were accepted if they could be established at greater than 95.0% probability by the Scaffold Local FDR algorithm. Protein identifications were accepted if they could be established at greater than 99.0% probability.

## **ELISA**

The quantification of serum exosome cytokines was determined using a Quantibody Human CXCL16 Array 1 Kit (MEIMIAN, China) following the manufacturers' protocol. Briefly, 0.5 µg of serum exosomes or a standard was added to a 96-well ELISA plate and then reacted with their cognate primary antibodies and HRP-conjugated secondary antibodies. 3, 3', 5, 5'-Tetramethylbenzidine (TMB) was used as the substrate, and the absorbance was measured at 450 nm with a microplate reader (Bio-Rad, USA)

## **CXCL16 knockdown**

Cells were cultured in 6-well plates with a  $5 \times 10^5$ /ml density. The cells were then transfected with 50 nM siCXCL16 RNA (si-CXCL16, sense: 5'-CAAAGAAUGUGGACAUGCU-3' ;anti-sense:

5'-AGCAUGUCCACAUUCUUU-3'; GenePharma, China) using the Lipofectamine 3000 reagent (Invitrogen, USA) for 48 h. The scrambled siRNA (GenePharma, China) was used as a negative control. The efficiency of knockdown was examined by RT-qPCR. The expression of target gene CXCL16 was detected by RT-qPCR and Western blot.

### **Experimental mouse techniques**

Mice were obtained from the Model Animal Center of Nanjing University (Nanjing, China) and were raised under pathogen-free conditions in Sun Yat-sen University Animal Center (Guangzhou, China). All of the animal studies were conducted in accordance with protocols approved by the Institutional Animal Care and Research Advisory Committee.

To establish a human CRC xenograft model, six-week-old BALB/c nude mice were subcutaneously (*s.c.*) inoculated with  $2 \times 10^6$  HCT116 cell. To establish a mouse CRC homograft model, six-week-old BALB/c mice were inoculated with  $2 \times 10^6$  CT26 cells by tail vein injection. After tumor transplantation, Fn-Ex, si-Ex or Ex (10  $\mu$ g) were injected intratumorally (*i.t.*) or intravenously (*i.v.*) every other day. PBS were injected as a control. Tumor growth and body weight were monitored every 2 days. Xenograft tumor growth was measured in three dimensions twice a week with a caliper. Tumor volume was calculated using the following formula:  $(\text{length} \times \text{width}^2)/2$ . The mice were sacrificed two weeks after the treatment began, and the tumors were surgically removed and counted.

## **Histology**

Tissues were fixed in 10% buffered formalin for 24 h, processed, and embedded in paraffin for sectioning according to the conventional methods. The paraffin-embedded tissues were cut into 5- $\mu$ m-thick sections. The sections were dewaxed, rehydrated and rinsed.

The tumor cell density in H&E stained sections was calculated by scanning the tissue sections under a microscope at  $\times 40$ -power and counting the number of nuclei in each histological image in ten different, randomly selected fields. Data were averaged over the ten fields for statistical analysis.

## **Histology immunohistochemical assays**

Tissue sections were incubated with a primary antibody GSK3 $\beta$  (1:50, BOSTER) at 4°C overnight. After washing with PBST, the sections were incubated with an HRP-conjugated anti-mouse or anti-rabbit secondary antibody (1:5000, BOSTER) at room temperature for 2 h. The sections were developed with 3-diaminobenzidine tetrahydrochloride for 10 s, which was followed by counterstaining with 10% Mayer's haematoxylin.

## **Statistical analyses**

The data represent the mean  $\pm$  SD unless otherwise indicated. Data were analyzed by two-tailed unpaired Student's t-test between two groups and by One-Way ANOVA

followed by Bonferroni test for multiple comparisons. Significance was considered  $P < 0.05$ . Statistical analyses were performed using GraphPad 6.0.

## References

- 1 Guo S, Li L, Xu B, *et al.* A Simple and Novel Fecal Biomarker for Colorectal Cancer: Ratio of *Fusobacterium Nucleatum* to Probiotics Populations, Based on Their Antagonistic Effect. *Clin Chem* 2018;**64**:1327-37.

## Supplementary Table

**Table S1** Sequence of primer.

| miRNA           | Primer (5'-3')                                  |
|-----------------|-------------------------------------------------|
| hsa-miR-1246    | AATGGATTTTTGGAGCAGGAA                           |
| hsa-miR-92b-3p  | GCACTCGTCCCGGCCTCC                              |
| hsa-miR-27a-3p  | TCACAGTGGCTAAGTTCCGC                            |
| hsa-miR-128-3p  | TCACAGTGAACCGGTCTCTTT                           |
| hsa-miR-7704    | GGGTCGGCGGCGACGTG                               |
| hsa-miR-3195    | CGCGCCGGGCCCGGGTT                               |
| hsa-miR-224-5p  | CAAGTCACTAGTGGTTCCGTT                           |
| hsa-miR-151a-3p | CTAGACTGAAGCTCCTTGAG                            |
| hsa-miR-1307-3p | GCGTGGCGTCGGTCGTG                               |
| hsa-miR-21-5p   | TAGCTTATCAGACTGATGTTGA                          |
| U6              | F: CTCGCTTCGGCAGCACA<br>R: AACGCTTCACGAATTTGCGT |

**Table S2** Sequences for microRNA mimics and inhibitors.

| <b>Name</b>           | <b>Sequence (5'-3')</b> |
|-----------------------|-------------------------|
| miR-1246 mimics       | AAUGGAUUUUUGGAGCAGG     |
| miR-1246 inhibitor    | CCUGCUCCAAAAAUCCAUU     |
| miR-92b-3p mimics     | GCACUCGUCCCGGCCUCC      |
| miR-92b-3p inhibitor  | GGAGGCCGGGACGAGUGC      |
| miR-27a-3p mimics     | UCACAGUGGCUAAGUCCGC     |
| miR-27a-3p inhibitor  | GCGGAACUUAGCCACUGTGA    |
| negative control (NC) | ACUAGUCGAUCAUGUGUGAUATT |

**Table S3** Summary of small RNA sequencing of Fn-infected and non-infected exosomes (Fn-Ex and Ex).

| Categories | Ex          |         | Fn-Ex       |         |
|------------|-------------|---------|-------------|---------|
|            | Clean Reads | percent | Clean Reads | percent |
| All        | 18170471    | 100%    | 18668313    | 100%    |
| miRNA      | 2408579     | 13.26%  | 3089284     | 16.55%  |
| tRNA       | 202727      | 1.12%   | 274875      | 1.47%   |
| rRNA       | 11175946    | 61.51%  | 12192919    | 65.31%  |
| snRNA      | 920965      | 5.07%   | 584985      | 3.13%   |
| snoRNA     | 132751      | 0.73%   | 65536       | 0.35%   |
| piRNA      | 2522604     | 13.88%  | 1502548     | 8.05%   |
| Y_RNA      | 348825      | 1.92%   | 112815      | 0.60%   |
| Others     | 458074      | 2.52%   | 845351      | 4.53%   |

**Table S4** Number of miRNA identified in each sample.

| Ex               |             |                  | Fn-Ex            |             |                  |
|------------------|-------------|------------------|------------------|-------------|------------------|
| miRNA ID         | Total Count | Normalized Value | miRNA ID         | Total Count | Normalized Value |
| hsa-let-7a-3p    | 44          | 2.4215           | hsa-miR-16-5p    | 99          | 5.3031           |
| hsa-let-7a-5p    | 7718        | 424.7551         | hsa-miR-92a-3p   | 31          | 16.957612        |
| hsa-let-7b-3p    | 130         | 7.154            | hsa-miR-221-5p   | 26          | 1.3927           |
| hsa-let-7b-5p    | 1891        | 104.0699         | hsa-miR-182-5p   | 4814        | 257.8701         |
| hsa-let-7c-5p    | 871         | 47.9349          | hsa-miR-320a     | 2528        | 135.4166         |
| hsa-let-7d-3p    | 88          | 4.843            | hsa-miR-361-3p   | 222         | 11.8918          |
| hsa-let-7d-5p    | 455         | 25.0406          | hsa-miR-20a-5p   | 1172        | 62.7802          |
| hsa-let-7e-5p    | 305         | 16.7855          | hsa-miR-152-3p   | 650         | 34.8184          |
| hsa-let-7f-1-3p  | 16          | 0.8805           | hsa-miR-516a-5p  | 32          | 1.7141           |
| hsa-let-7f-5p    | 28025       | 1542.3376        | hsa-let-7i-5p    | 70993       | 3802.861         |
| hsa-let-7g-5p    | 4376        | 240.8303         | hsa-let-7g-5p    | 10444       | 559.4507         |
| hsa-let-7i-5p    | 29850       | 1642.7752        | hsa-let-7f-5p    | 98404       | 5271.178         |
| hsa-miR-100-5p   | 11846       | 651.9369         | hsa-let-7a-5p    | 35131       | 1881.8519        |
| hsa-miR-101-3p   | 210         | 11.5572          | hsa-miR-222-3p   | 464         | 24.855           |
| hsa-miR-103a-3p  | 591         | 32.5253          | hsa-miR-4497     | 1264        | 67.7083          |
| hsa-miR-105-5p   | 60          | 3.3021           | hsa-miR-584-5p   | 131         | 7.0172           |
| hsa-miR-106a-5p  | 43          | 2.3665           | hsa-miR-574-3p   | 98          | 5.2495           |
| hsa-miR-106b-3p  | 587         | 32.3052          | hsa-miR-582-3p   | 1240        | 66.4227          |
| hsa-miR-106b-5p  | 17          | 0.9356           | hsa-miR-4746-5p  | 34          | 1.8213           |
| hsa-miR-107      | 12          | 0.6604           | hsa-miR-30b-5p   | 23          | 1.232            |
| hsa-miR-10a-5p   | 3929        | 216.2299         | hsa-miR-10a-5p   | 8727        | 467.4766         |
| hsa-miR-10b-5p   | 832         | 45.7886          | hsa-miR-423-3p   | 2218        | 118.8109         |
| hsa-miR-1180-3p  | 52          | 2.8618           | hsa-miR-24-2-5p  | 107         | 5.7316           |
| hsa-miR-122-5p   | 122         | 6.7142           | hsa-miR-203a-3p  | 273         | 14.6237          |
| hsa-miR-1246     | 107246      | 5902.2135        | hsa-miR-1246     | 638174      | 34184.8779       |
| hsa-miR-1248     | 131         | 7.2095           | hsa-miR-7706     | 282         | 15.1058          |
| hsa-miR-1255a    | 19          | 1.0457           | hsa-miR-3934-5p  | 36          | 1.9284           |
| hsa-miR-125a-5p  | 389         | 21.4084          | hsa-miR-98-5p    | 1049        | 56.1915          |
| hsa-miR-125b-1-3 | 18          | 0.9906           | hsa-miR-15b-3p   | 35          | 1.8748           |
| hsa-miR-125b-2-3 | 10          | 0.5503           | hsa-miR-335-5p   | 20          | 1.0713           |
| hsa-miR-125b-5p  | 170         | 9.3558           | hsa-miR-335-3p   | 340         | 18.2127          |
| hsa-miR-126-3p   | 315         | 17.3358          | hsa-miR-1307-3p  | 778         | 41.6749          |
| hsa-miR-1273g-3p | 30          | 1.651            | hsa-miR-425-5p   | 59          | 3.1604           |
| hsa-miR-127-3p   | 13          | 0.7154           | hsa-miR-194-5p   | 25          | 1.3392           |
| hsa-miR-1283     | 36          | 1.9812           | hsa-miR-1304-3p  | 74          | 3.9639           |
| hsa-miR-128-3p   | 691         | 38.0287          | hsa-miR-7704     | 2167        | 116.079          |
| hsa-miR-1290     | 10          | 0.5503           | hsa-miR-17-5p    | 251         | 13.4452          |
| hsa-miR-1291     | 40          | 2.2014           | hsa-miR-3656     | 85          | 4.5532           |
| hsa-miR-129-5p   | 69          | 3.7974           | hsa-miR-5701     | 142         | 7.6065           |
| hsa-miR-1301-3p  | 15          | 0.8255           | hsa-miR-31-5p    | 28          | 1.4999           |
| hsa-miR-1304-3p  | 23          | 1.2658           | hsa-miR-1273g-3p | 43          | 2.3034           |
| hsa-miR-1307-3p  | 196         | 10.7867          | hsa-miR-95-3p    | 397         | 21.266           |
| hsa-miR-130a-3p  | 16          | 0.8805           | hsa-miR-1255a    | 31          | 1.6606           |
| hsa-miR-130b-5p  | 44          | 2.4215           | hsa-miR-5480-3p  | 99          | 5.3031           |
| hsa-miR-132-3p   | 79          | 4.3477           | hsa-miR-365b-3p  | 192         | 10.2848          |
| hsa-miR-132-5p   | 20          | 1.1007           | hsa-miR-1301-3p  | 38          | 2.0355           |
| hsa-miR-139-5p   | 16          | 0.8805           | hsa-miR-378d     | 32          | 1.7141           |
| hsa-miR-1-3p     | 44          | 2.4215           | hsa-miR-374a-3p  | 99          | 5.3031           |
| hsa-miR-140-3p   | 256         | 14.0888          | hsa-miR-26b-5p   | 600         | 32.14            |
| hsa-miR-140-5p   | 18          | 0.9906           | hsa-miR-378g     | 35          | 1.8748           |
| hsa-miR-143-3p   | 684         | 37.6435          | hsa-miR-30e-3p   | 1998        | 107.0263         |
| hsa-miR-145-5p   | 10          | 0.5503           | hsa-miR-331-3p   | 20          | 1.0713           |
| hsa-miR-146a-5p  | 19          | 1.0457           | hsa-miR-19a-3p   | 37          | 1.982            |
| hsa-miR-146b-5p  | 102         | 5.6135           | hsa-miR-486-5p   | 246         | 13.1774          |
| hsa-miR-148a-3p  | 3879        | 213.4782         | hsa-miR-941      | 7223        | 386.9123         |
| hsa-miR-148b-3p  | 682         | 37.5334          | hsa-miR-106b-3p  | 1981        | 106.1156         |
| hsa-miR-149-5p   | 42          | 2.3114           | hsa-miR-501-3p   | 89          | 4.7674           |
| hsa-miR-151a-3p  | 3365        | 185.1906         | hsa-miR-26a-5p   | 6808        | 364.6821         |
| hsa-miR-152-3p   | 175         | 9.631            | hsa-miR-140-3p   | 371         | 19.8732          |
| hsa-miR-15b-3p   | 32          | 1.7611           | hsa-miR-193a-5p  | 72          | 3.8568           |
| hsa-miR-15b-5p   | 27          | 1.4859           | hsa-miR-1283     | 56          | 2.9997           |
| hsa-miR-16-2-3p  | 73          | 4.0175           | hsa-miR-129-5p   | 160         | 8.5707           |
| hsa-miR-16-5p    | 67          | 3.6873           | hsa-miR-1180-3p  | 141         | 7.5529           |
| hsa-miR-17-5p    | 205         | 11.282           | hsa-let-7d-3p    | 457         | 24.48            |
| hsa-miR-181a-2-3 | 13          | 0.7154           | hsa-miR-93-5p    | 293         | 15.695           |

|                  |       |           |
|------------------|-------|-----------|
| hsa-miR-181a-5p  | 119   | 6.5491    |
| hsa-miR-181b-5p  | 86    | 4.733     |
| hsa-miR-181d-5p  | 29    | 1.596     |
| hsa-miR-182-5p   | 4624  | 254.4788  |
| hsa-miR-183-5p   | 1846  | 101.5934  |
| hsa-miR-185-5p   | 345   | 18.9868   |
| hsa-miR-186-5p   | 201   | 11.0619   |
| hsa-miR-191-5p   | 636   | 35.0018   |
| hsa-miR-192-5p   | 1419  | 78.0937   |
| hsa-miR-193a-5p  | 18    | 0.9906    |
| hsa-miR-193b-3p  | 29    | 1.596     |
| hsa-miR-194-5p   | 26    | 1.4309    |
| hsa-miR-196a-5p  | 1586  | 87.2845   |
| hsa-miR-196b-5p  | 161   | 8.8605    |
| hsa-miR-197-3p   | 75    | 4.1276    |
| hsa-miR-199a-3p  | 21    | 1.1557    |
| hsa-miR-199b-3p  | 21    | 1.1557    |
| hsa-miR-19a-3p   | 42    | 2.3114    |
| hsa-miR-19b-3p   | 45    | 2.4765    |
| hsa-miR-200b-3p  | 42    | 2.3114    |
| hsa-miR-200c-3p  | 36    | 1.9812    |
| hsa-miR-203a-3p  | 92    | 5.0632    |
| hsa-miR-20a-5p   | 618   | 34.0112   |
| hsa-miR-210-3p   | 60    | 3.3021    |
| hsa-miR-212-5p   | 43    | 2.3665    |
| hsa-miR-215-5p   | 28    | 1.541     |
| hsa-miR-21-5p    | 35446 | 1950.7475 |
| hsa-miR-218-5p   | 15    | 0.8255    |
| hsa-miR-221-3p   | 362   | 19.9224   |
| hsa-miR-221-5p   | 31    | 1.7061    |
| hsa-miR-222-3p   | 205   | 11.282    |
| hsa-miR-22-3p    | 72    | 3.9625    |
| hsa-miR-224-5p   | 1310  | 72.095    |
| hsa-miR-23a-3p   | 596   | 32.8005   |
| hsa-miR-23b-3p   | 307   | 16.8955   |
| hsa-miR-24-2-5p  | 61    | 3.3571    |
| hsa-miR-24-3p    | 942   | 51.8424   |
| hsa-miR-25-3p    | 1729  | 95.1544   |
| hsa-miR-26a-5p   | 2410  | 132.6328  |
| hsa-miR-26b-5p   | 338   | 18.6016   |
| hsa-miR-27a-3p   | 321   | 17.666    |
| hsa-miR-27b-3p   | 1157  | 63.6747   |
| hsa-miR-27b-5p   | 10    | 0.5503    |
| hsa-miR-28-3p    | 463   | 25.4809   |
| hsa-miR-28-5p    | 14    | 0.7705    |
| hsa-miR-29a-3p   | 162   | 8.9156    |
| hsa-miR-29b-3p   | 13    | 0.7154    |
| hsa-miR-3065-5p  | 12    | 0.6604    |
| hsa-miR-30a-3p   | 1149  | 63.2345   |
| hsa-miR-30a-5p   | 3126  | 172.0374  |
| hsa-miR-30b-5p   | 16    | 0.8805    |
| hsa-miR-30c-2-3p | 84    | 4.6229    |
| hsa-miR-30c-5p   | 881   | 48.4853   |
| hsa-miR-30d-5p   | 2837  | 156.1324  |
| hsa-miR-30e-3p   | 550   | 30.2689   |
| hsa-miR-30e-5p   | 74    | 4.0725    |
| hsa-miR-3135b    | 24    | 1.3208    |
| hsa-miR-3195     | 14    | 0.7705    |
| hsa-miR-3196     | 22    | 1.2108    |
| hsa-miR-320a     | 1569  | 86.3489   |
| hsa-miR-320b     | 57    | 3.137     |
| hsa-miR-320c     | 71    | 3.9074    |
| hsa-miR-320d     | 65    | 3.5772    |
| hsa-miR-32-5p    | 30    | 1.651     |
| hsa-miR-328-3p   | 13    | 0.7154    |
| hsa-miR-330-3p   | 177   | 9.7411    |
| hsa-miR-331-3p   | 15    | 0.8255    |
| hsa-miR-335-3p   | 76    | 4.1826    |

|                   |        |           |
|-------------------|--------|-----------|
| hsa-miR-320b      | 271    | 14.5166   |
| hsa-miR-132-3p    | 214    | 11.4633   |
| hsa-miR-132-5p    | 58     | 3.1069    |
| hsa-miR-148a-3p   | 13493  | 722.7755  |
| hsa-miR-30d-5p    | 4467   | 239.2825  |
| hsa-miR-125a-5p   | 894    | 47.8886   |
| hsa-miR-125b-5p   | 444    | 23.7836   |
| hsa-miR-30c-5p    | 1967   | 105.3657  |
| hsa-miR-99b-5p    | 3626   | 194.2329  |
| hsa-miR-345-5p    | 34     | 1.8213    |
| hsa-miR-125b-1-3p | 58     | 3.1069    |
| hsa-miR-32-5p     | 54     | 2.8926    |
| hsa-miR-183-5p    | 4247   | 227.4978  |
| hsa-miR-320c      | 321    | 17.1949   |
| hsa-miR-105-5p    | 175    | 9.3742    |
| hsa-let-7f-1-3p   | 39     | 2.0891    |
| hsa-miR-1-3p      | 39     | 2.0891    |
| hsa-miR-200b-3p   | 95     | 5.0888    |
| hsa-miR-424-3p    | 102    | 5.4638    |
| hsa-miR-149-5p    | 93     | 4.9817    |
| hsa-miR-193b-3p   | 75     | 4.0175    |
| hsa-miR-197-3p    | 237    | 12.6953   |
| hsa-miR-532-5p    | 1930   | 103.3837  |
| hsa-miR-4516      | 130    | 6.9637    |
| hsa-miR-340-5p    | 96     | 5.1424    |
| hsa-miR-338-5p    | 56     | 2.9997    |
| hsa-miR-21-5p     | 112217 | 6011.0948 |
| hsa-miR-130a-3p   | 29     | 1.5534    |
| hsa-miR-185-5p    | 945    | 50.6205   |
| hsa-miR-30e-5p    | 71     | 3.8032    |
| hsa-miR-23b-3p    | 455    | 24.3729   |
| hsa-miR-4508      | 149    | 7.9814    |
| hsa-miR-30a-5p    | 3542   | 189.7333  |
| hsa-let-7d-5p     | 1647   | 88.2244   |
| hsa-miR-1290      | 71     | 3.81395   |
| hsa-miR-342-3p    | 131    | 7.0172    |
| hsa-miR-27b-3p    | 2975   | 159.3609  |
| hsa-miR-99a-5p    | 4345   | 232.7473  |
| hsa-miR-25-3p     | 6441   | 345.0231  |
| hsa-miR-181a-2-3p | 82     | 4.40854   |
| hsa-miR-191-5p    | 806    | 43.1748   |
| hsa-let-7c-5p     | 3362   | 180.0913  |
| hsa-miR-1261      | 21     | 1.1249    |
| hsa-miR-23a-3p    | 1184   | 63.423    |
| hsa-miR-340-3p    | 28     | 1.4999    |
| hsa-miR-320d      | 335    | 17.9448   |
| hsa-miR-140-5p    | 25     | 1.3392    |
| hsa-miR-450a-5p   | 23     | 1.232     |
| hsa-miR-196a-5p   | 3116   | 166.9139  |
| hsa-let-7b-5p     | 6766   | 362.4323  |
| hsa-miR-3135b     | 32     | 1.7141    |
| hsa-miR-130b-5p   | 203    | 10.874    |
| hsa-miR-92b-3p    | 2646   | 141.7375  |
| hsa-miR-7-5p      | 6443   | 345.1303  |
| hsa-miR-103a-3p   | 1193   | 63.9051   |
| hsa-miR-330-3p    | 161    | 8.6242    |
| hsa-miR-21-3p     | 43     | 2.3034    |
| hsa-miR-451a      | 28     | 1.4999    |
| hsa-miR-760       | 40     | 2.1427    |
| hsa-miR-378a-3p   | 3876   | 207.6245  |
| hsa-miR-744-5p    | 110    | 5.8923    |
| hsa-let-7a-3p     | 144    | 7.7136    |
| hsa-miR-22-3p     | 132    | 7.0708    |
| hsa-miR-210-3p    | 62     | 3.3211    |
| hsa-miR-19b-3p    | 24     | 1.2856    |
| hsa-miR-186-5p    | 377    | 20.1946   |
| hsa-miR-502-3p    | 29     | 1.5534    |
| hsa-miR-629-5p    | 181    | 9.6956    |



|                 |       |           |
|-----------------|-------|-----------|
| hsa-miR-338-5p  | 29    | 1.596     |
| hsa-miR-340-5p  | 38    | 2.0913    |
| hsa-miR-342-3p  | 145   | 7.98      |
| hsa-miR-345-5p  | 13    | 0.7154    |
| hsa-miR-34a-5p  | 11    | 0.6054    |
| hsa-miR-361-3p  | 126   | 6.9343    |
| hsa-miR-3615    | 27    | 1.4859    |
| hsa-miR-361-5p  | 16    | 0.8805    |
| hsa-miR-3656    | 60    | 3.3021    |
| hsa-miR-365a-3p | 157   | 8.6404    |
| hsa-miR-365b-3p | 157   | 8.6404    |
| hsa-miR-374a-3p | 59    | 3.247     |
| hsa-miR-374a-5p | 22    | 1.2108    |
| hsa-miR-374b-5p | 79    | 4.3477    |
| hsa-miR-378a-3p | 1268  | 69.7836   |
| hsa-miR-378f    | 14    | 0.7705    |
| hsa-miR-3934-5p | 17    | 0.9356    |
| hsa-miR-3960    | 12    | 0.6604    |
| hsa-miR-421     | 19    | 1.0457    |
| hsa-miR-423-3p  | 605   | 33.2958   |
| hsa-miR-423-5p  | 236   | 12.9881   |
| hsa-miR-425-5p  | 182   | 10.0163   |
| hsa-miR-4488    | 116   | 6.384     |
| hsa-miR-4492    | 21    | 1.1557    |
| hsa-miR-4497    | 220   | 12.1076   |
| hsa-miR-4508    | 29    | 1.596     |
| hsa-miR-450b-5p | 42    | 2.3114    |
| hsa-miR-4516    | 119   | 6.5491    |
| hsa-miR-451a    | 12    | 0.6604    |
| hsa-miR-452-5p  | 238   | 13.0982   |
| hsa-miR-454-3p  | 30    | 1.651     |
| hsa-miR-455-3p  | 11    | 0.6054    |
| hsa-miR-455-5p  | 47    | 2.5866    |
| hsa-miR-4634    | 10    | 0.5503    |
| hsa-miR-4664-3p | 26    | 1.4309    |
| hsa-miR-484     | 105   | 5.7786    |
| hsa-miR-486-5p  | 947   | 52.1175   |
| hsa-miR-500a-3p | 42    | 2.3114    |
| hsa-miR-501-3p  | 25    | 1.3759    |
| hsa-miR-505-3p  | 11    | 0.6054    |
| hsa-miR-516a-5p | 11    | 0.6054    |
| hsa-miR-522-3p  | 70    | 3.8524    |
| hsa-miR-532-5p  | 593   | 32.6354   |
| hsa-miR-548e-3p | 10    | 0.5503    |
| hsa-miR-548o-3p | 73    | 4.0175    |
| hsa-miR-5701    | 48    | 2.6416    |
| hsa-miR-574-3p  | 45    | 2.4765    |
| hsa-miR-576-3p  | 33    | 1.8161    |
| hsa-miR-582-3p  | 425   | 23.3896   |
| hsa-miR-584-5p  | 31    | 1.7061    |
| hsa-miR-589-5p  | 136   | 7.4847    |
| hsa-miR-615-3p  | 8     | 0.41276   |
| hsa-miR-619-5p  | 18    | 0.9906    |
| hsa-miR-625-3p  | 11    | 0.6054    |
| hsa-miR-629-5p  | 49    | 2.6967    |
| hsa-miR-641     | 12    | 0.6604    |
| hsa-miR-651-5p  | 22    | 1.2108    |
| hsa-miR-6516-3p | 25    | 1.3759    |
| hsa-miR-664a-3p | 26    | 1.4309    |
| hsa-miR-671-3p  | 23    | 1.2658    |
| hsa-miR-744-5p  | 35    | 1.9262    |
| hsa-miR-7-5p    | 10799 | 594.3159  |
| hsa-miR-7641    | 23832 | 1311.5785 |
| hsa-miR-767-5p  | 25    | 1.3759    |
| hsa-miR-769-5p  | 39    | 2.1463    |
| hsa-miR-7704    | 197   | 10.8418   |
| hsa-miR-7706    | 66    | 3.6323    |
| hsa-miR-92a-3p  | 53    | 2.928378  |

|                   |       |           |
|-------------------|-------|-----------|
| hsa-miR-15b-5p    | 58    | 3.1069    |
| hsa-miR-200c-3p   | 82    | 4.3925    |
| hsa-miR-589-5p    | 294   | 15.7486   |
| hsa-miR-6130      | 24    | 1.2856    |
| hsa-miR-18a-3p    | 22    | 1.1785    |
| hsa-miR-96-5p     | 275   | 14.7308   |
| hsa-miR-181d-5p   | 55    | 2.9462    |
| hsa-miR-3196      | 31    | 1.6606    |
| hsa-miR-3195      | 124   | 6.6423    |
| hsa-miR-181a-5p   | 308   | 16.4985   |
| hsa-miR-16-2-3p   | 305   | 16.3378   |
| hsa-miR-450b-5p   | 111   | 5.9459    |
| hsa-miR-374a-5p   | 42    | 2.2498    |
| hsa-miR-30c-2-3p  | 183   | 9.8027    |
| hsa-miR-192-5p    | 3458  | 185.2337  |
| hsa-miR-106b-5p   | 27    | 1.4463    |
| hsa-miR-151a-5p   | 32    | 1.7141    |
| hsa-miR-1281      | 23    | 1.232     |
| hsa-miR-651-5p    | 36    | 1.9284    |
| hsa-miR-28-3p     | 1758  | 94.1703   |
| hsa-miR-143-3p    | 521   | 27.9083   |
| hsa-miR-29a-3p    | 385   | 20.6232   |
| hsa-miR-4488      | 261   | 13.9809   |
| hsa-miR-455-3p    | 39    | 2.0891    |
| hsa-miR-101-3p    | 493   | 26.4084   |
| hsa-miR-125b-2-3p | 56    | 2.9997    |
| hsa-let-7b-3p     | 860   | 46.067    |
| hsa-miR-484       | 263   | 14.088    |
| hsa-miR-330-5p    | 23    | 1.232     |
| hsa-let-7e-5p     | 575   | 30.8009   |
| hsa-miR-215-5p    | 61    | 3.2676    |
| hsa-miR-421       | 21    | 1.1249    |
| hsa-miR-146b-5p   | 103   | 5.5174    |
| hsa-miR-199b-3p   | 19    | 1.0178    |
| hsa-miR-625-3p    | 52    | 2.7855    |
| hsa-miR-181b-5p   | 256   | 13.7131   |
| hsa-miR-128-3p    | 3116  | 166.9139  |
| hsa-miR-122-5p    | 88    | 4.7139    |
| hsa-miR-106a-5p   | 50    | 2.6783    |
| hsa-miR-22-5p     | 21    | 1.1249    |
| hsa-miR-27b-5p    | 22    | 1.1785    |
| hsa-miR-522-3p    | 143   | 7.66      |
| hsa-miR-10b-5p    | 1470  | 78.7431   |
| hsa-miR-199a-3p   | 19    | 1.0178    |
| hsa-miR-3615      | 149   | 7.9814    |
| hsa-miR-455-5p    | 105   | 5.6245    |
| hsa-miR-671-3p    | 101   | 5.4102    |
| hsa-miR-374b-5p   | 73    | 3.9104    |
| hsa-miR-148b-3p   | 1168  | 62.5659   |
| hsa-miR-4664-3p   | 68    | 3.6425    |
| hsa-miR-99b-3p    | 284   | 15.2129   |
| hsa-miR-196b-5p   | 166   | 8.8921    |
| hsa-miR-542-3p    | 34    | 1.8213    |
| hsa-miR-454-3p    | 21    | 1.1249    |
| hsa-miR-500a-3p   | 105   | 5.6245    |
| hsa-miR-135b-5p   | 23    | 1.232     |
| hsa-miR-4448      | 41    | 2.1962    |
| hsa-miR-576-3p    | 44    | 2.3569    |
| hsa-miR-361-5p    | 54    | 2.8926    |
| hsa-miR-139-5p    | 43    | 2.3034    |
| hsa-miR-769-5p    | 73    | 3.9104    |
| hsa-miR-7641      | 34912 | 1870.1208 |
| hsa-miR-100-5p    | 39358 | 2108.2783 |
| hsa-miR-767-5p    | 46    | 2.4641    |
| hsa-miR-4492      | 83    | 4.446     |
| hsa-miR-126-3p    | 417   | 22.3373   |
| hsa-miR-212-5p    | 137   | 7.3386    |
| hsa-miR-151a-3p   | 16153 | 865.263   |

|                |      |          |
|----------------|------|----------|
| hsa-miR-92b-3p | 301  | 16.5653  |
| hsa-miR-93-5p  | 286  | 15.7398  |
| hsa-miR-941    | 1932 | 106.3264 |
| hsa-miR-95-3p  | 162  | 8.9156   |
| hsa-miR-96-5p  | 239  | 13.1532  |
| hsa-miR-98-3p  | 22   | 1.2108   |
| hsa-miR-98-5p  | 591  | 32.5253  |
| hsa-miR-99a-5p | 1466 | 80.6804  |
| hsa-miR-99b-3p | 84   | 4.6229   |
| hsa-miR-99b-5p | 940  | 51.7323  |

|                   |      |          |
|-------------------|------|----------|
| hsa-miR-221-3p    | 628  | 33.6399  |
| hsa-miR-615-3p    | 62   | 3.32114  |
| hsa-miR-224-5p    | 5314 | 284.6535 |
| hsa-miR-452-5p    | 329  | 17.6234  |
| hsa-miR-423-5p    | 588  | 31.4972  |
| hsa-miR-28-5p     | 42   | 2.2498   |
| hsa-miR-27a-3p    | 1378 | 73.8149  |
| hsa-miR-30a-3p    | 3788 | 202.9107 |
| hsa-miR-365a-3p   | 192  | 10.2848  |
| hsa-miR-24-3p     | 2800 | 149.9868 |
| hsa-miR-148b-5p   | 19   | 1.0178   |
| hsa-miR-29b-3p    | 18   | 0.9642   |
| hsa-miR-219a-1-3p | 18   | 0.9642   |
| hsa-miR-125a-3p   | 18   | 0.9642   |
| hsa-miR-576-5p    | 18   | 0.9642   |
| hsa-miR-454-5p    | 18   | 0.9642   |
| hsa-miR-1291      | 18   | 0.9642   |
| hsa-miR-664a-5p   | 18   | 0.9642   |
| hsa-miR-92b-5p    | 17   | 0.9106   |
| hsa-miR-1254      | 17   | 0.9106   |
| hsa-miR-93-3p     | 16   | 0.8571   |
| hsa-miR-107       | 16   | 0.8571   |
| hsa-miR-519c-5p   | 16   | 0.8571   |
| hsa-miR-519b-5p   | 16   | 0.8571   |
| hsa-miR-523-5p    | 16   | 0.8571   |
| hsa-miR-518e-5p   | 16   | 0.8571   |
| hsa-miR-522-5p    | 16   | 0.8571   |
| hsa-miR-519a-5p   | 16   | 0.8571   |
| hsa-miR-942-5p    | 16   | 0.8571   |
| hsa-miR-378f      | 16   | 0.8571   |
| hsa-miR-4791      | 16   | 0.8571   |
| hsa-miR-6747-3p   | 16   | 0.8571   |
| hsa-miR-98-3p     | 15   | 0.8035   |
| hsa-miR-422a      | 15   | 0.8035   |
| hsa-miR-548e-3p   | 15   | 0.8035   |
| hsa-miR-1248      | 15   | 0.8035   |
| hsa-miR-2110      | 15   | 0.8035   |
| hsa-miR-3622a-5p  | 15   | 0.8035   |
| hsa-miR-331-5p    | 14   | 0.7499   |
| hsa-miR-652-3p    | 14   | 0.7499   |
| hsa-miR-1303      | 14   | 0.7499   |
| hsa-miR-4485-3p   | 14   | 0.7499   |
| hsa-miR-23b-5p    | 13   | 0.6964   |
| hsa-miR-339-3p    | 13   | 0.6964   |
| hsa-miR-505-3p    | 13   | 0.6964   |
| hsa-miR-3690      | 13   | 0.6964   |
| hsa-miR-378e      | 13   | 0.6964   |
| hsa-miR-4677-3p   | 13   | 0.6964   |
| hsa-miR-218-5p    | 12   | 0.6428   |
| hsa-miR-126-5p    | 12   | 0.6428   |
| hsa-miR-328-3p    | 12   | 0.6428   |
| hsa-miR-1827      | 12   | 0.6428   |
| hsa-miR-548aq-3p  | 12   | 0.6428   |
| hsa-miR-6720-3p   | 12   | 0.6428   |
| hsa-miR-9-5p      | 11   | 0.5892   |
| hsa-miR-185-3p    | 11   | 0.5892   |
| hsa-miR-324-3p    | 11   | 0.5892   |
| hsa-miR-532-3p    | 11   | 0.5892   |
| hsa-miR-641       | 11   | 0.5892   |
| hsa-miR-1250-5p   | 11   | 0.5892   |
| hsa-miR-664a-3p   | 11   | 0.5892   |
| hsa-miR-3065-5p   | 11   | 0.5892   |
| hsa-miR-3960      | 11   | 0.5892   |
| hsa-miR-4661-5p   | 11   | 0.5892   |
| hsa-miR-30d-3p    | 10   | 0.5357   |
| hsa-miR-10a-3p    | 10   | 0.5357   |
| hsa-miR-146a-5p   | 10   | 0.5357   |
| hsa-miR-130b-3p   | 10   | 0.5357   |

|                  |    |        |
|------------------|----|--------|
| hsa-miR-338-3p   | 10 | 0.5357 |
| hsa-miR-409-3p   | 10 | 0.5357 |
| hsa-miR-675-3p   | 10 | 0.5357 |
| hsa-miR-320e     | 10 | 0.5357 |
| hsa-miR-4326     | 10 | 0.5357 |
| hsa-miR-3928-3p  | 10 | 0.5357 |
| hsa-miR-548ah-3p | 10 | 0.5357 |
| hsa-miR-4634     | 10 | 0.5357 |

**Table S5** miRNA with significantly different expression levels between Ex and Fn-Ex.

| miRNA ID          | Ex (normalized value) | Fn-Ex(normalized value) | up/down | log2(foldchange) | P-value  |
|-------------------|-----------------------|-------------------------|---------|------------------|----------|
| hsa-miR-1248      | 7.2095                | 0.8035                  | down    | -3.1655          | 1.91E-07 |
| hsa-miR-6516-3p   | 1.3759                | 0                       | down    | -7.1042          | 9.48E-06 |
| hsa-miR-619-5p    | 0.9906                | 0                       | down    | -6.6302          | 7.45E-05 |
| hsa-miR-425-5p    | 10.0163               | 3.1604                  | down    | -1.6642          | 0.000154 |
| hsa-miR-127-3p    | 0.7154                | 0                       | down    | -6.1607          | 0.00053  |
| hsa-miR-34a-5p    | 0.6054                | 0                       | down    | -5.9198          | 0.001409 |
| hsa-miR-145-5p    | 0.5503                | 0                       | down    | -5.7821          | 0.001996 |
| hsa-miR-1291      | 2.2014                | 0.9642                  | down    | -1.191           | 0.003964 |
| hsa-miR-664a-3p   | 1.4309                | 0.5892                  | down    | -1.2801          | 0.008158 |
| hsa-miR-486-5p    | 13.1774               | 52.1175                 | up      | 1.9837           | 1.47E-05 |
| hsa-miR-424-3p    | 0                     | 5.4638                  | up      | 9.0938           | 3.19E-07 |
| hsa-miR-21-3p     | 0                     | 2.3034                  | up      | 7.8476           | 0.000157 |
| hsa-miR-760       | 0                     | 2.1427                  | up      | 7.7433           | 0.000244 |
| hsa-miR-4448      | 0                     | 2.1962                  | up      | 7.7789           | 0.000244 |
| hsa-miR-542-3p    | 0                     | 1.8213                  | up      | 7.5088           | 0.000622 |
| hsa-miR-378g      | 0                     | 1.8748                  | up      | 7.5506           | 0.000622 |
| hsa-miR-4746-5p   | 0                     | 1.8213                  | up      | 7.5088           | 0.000622 |
| hsa-miR-7704      | 10.8418               | 116.079                 | up      | 3.4204           | 0.000857 |
| hsa-miR-450a-5p   | 0                     | 1.232                   | up      | 6.9449           | 0.001006 |
| hsa-miR-330-5p    | 0                     | 1.232                   | up      | 6.9449           | 0.001006 |
| hsa-miR-135b-5p   | 0                     | 1.232                   | up      | 6.9449           | 0.001006 |
| hsa-miR-1281      | 0                     | 1.232                   | up      | 6.9449           | 0.001006 |
| hsa-miR-151a-5p   | 0                     | 1.7141                  | up      | 7.4213           | 0.001028 |
| hsa-miR-378d      | 0                     | 1.7141                  | up      | 7.4213           | 0.001028 |
| hsa-miR-18a-3p    | 0                     | 1.1785                  | up      | 6.8808           | 0.001409 |
| hsa-miR-1261      | 0                     | 1.1249                  | up      | 6.8137           | 0.001409 |
| hsa-miR-22-5p     | 0                     | 1.1249                  | up      | 6.8137           | 0.001409 |
| hsa-miR-31-5p     | 0                     | 1.4999                  | up      | 7.2287           | 0.001744 |
| hsa-miR-340-3p    | 0                     | 1.4999                  | up      | 7.2287           | 0.001744 |
| hsa-miR-502-3p    | 0                     | 1.5534                  | up      | 7.2793           | 0.001744 |
| hsa-miR-335-5p    | 0                     | 1.0713                  | up      | 6.7432           | 0.001996 |
| hsa-miR-125a-3p   | 0                     | 0.9642                  | up      | 6.5913           | 0.002864 |
| hsa-miR-576-5p    | 0                     | 0.9642                  | up      | 6.5913           | 0.002864 |
| hsa-miR-454-5p    | 0                     | 0.9642                  | up      | 6.5913           | 0.002864 |
| hsa-miR-148b-5p   | 0                     | 1.0178                  | up      | 6.6693           | 0.002864 |
| hsa-miR-664a-5p   | 0                     | 0.9642                  | up      | 6.5913           | 0.002864 |
| hsa-miR-219a-1-3p | 0                     | 0.9642                  | up      | 6.5913           | 0.002864 |
| hsa-miR-92b-3p    | 16.5653               | 141.7375                | up      | 3.097            | 0.003633 |
| hsa-miR-6130      | 0                     | 1.2856                  | up      | 7.0063           | 0.004066 |
| hsa-miR-92b-5p    | 0                     | 0.9106                  | up      | 6.5087           | 0.004166 |
| hsa-miR-519a-5p   | 0                     | 0.8571                  | up      | 6.4214           | 0.006149 |
| hsa-miR-422a      | 0                     | 0.8035                  | up      | 6.3282           | 0.006149 |
| hsa-miR-6747-3p   | 0                     | 0.8571                  | up      | 6.4214           | 0.006149 |
| hsa-miR-518e-5p   | 0                     | 0.8571                  | up      | 6.4214           | 0.006149 |
| hsa-miR-615-3p    | 0.41276               | 3.2114                  | up      | 3.0083           | 0.006575 |
| hsa-miR-3615      | 1.4859                | 7.9814                  | up      | 2.4253           | 0.007351 |
| hsa-let-7d-3p     | 4.843                 | 24.48                   | up      | 2.3376           | 0.007357 |
| hsa-miR-320d      | 3.5772                | 17.9448                 | up      | 2.3267           | 0.008072 |
| hsa-miR-4485-3p   | 0                     | 0.7499                  | up      | 6.2286           | 0.009224 |
| hsa-miR-1303      | 0                     | 0.7499                  | up      | 6.2286           | 0.009224 |
| hsa-miR-652-3p    | 0                     | 0.7499                  | up      | 6.2286           | 0.009224 |
| hsa-miR-331-5p    | 0                     | 0.7499                  | up      | 6.2286           | 0.009224 |
| hsa-miR-27a-3p    | 185.1906              | 865.263                 | up      | 2.2241           | 0.00923  |
| hsa-miR-4508      | 1.596                 | 7.9814                  | up      | 2.3222           | 0.009773 |
| hsa-miR-3195      | 0.7705                | 6.6423                  | up      | 3.1078           | 0.011498 |
| hsa-miR-1307-3p   | 424.7551              | 1881.8519               | up      | 2.1474           | 0.011623 |
| hsa-miR-320b      | 3.137                 | 14.5166                 | up      | 2.2102           | 0.011661 |
| hsa-miR-128-3p    | 38.0287               | 166.9139                | up      | 2.1339           | 0.012266 |
| hsa-miR-125b-2-3p | 0.5503                | 2.9997                  | up      | 2.4465           | 0.01307  |
| hsa-miR-130b-5p   | 2.4215                | 10.874                  | up      | 2.1669           | 0.013488 |
| hsa-miR-320c      | 3.9074                | 17.1949                 | up      | 2.1377           | 0.013557 |
| hsa-miR-4677-3p   | 0                     | 0.6964                  | up      | 6.1218           | 0.014079 |
| hsa-miR-339-3p    | 0                     | 0.6964                  | up      | 6.1218           | 0.014079 |
| hsa-miR-3690      | 0                     | 0.6964                  | up      | 6.1218           | 0.014079 |
| hsa-miR-378e      | 0                     | 0.6964                  | up      | 6.1218           | 0.014079 |
| hsa-miR-23b-5p    | 0                     | 0.6964                  | up      | 6.1218           | 0.014079 |

|                   |           |            |    |        |          |
|-------------------|-----------|------------|----|--------|----------|
| hsa-miR-335-3p    | 4.1826    | 18.2127    | up | 2.1225 | 0.014249 |
| hsa-miR-151a-3p   | 17.666    | 73.8149    | up | 2.0629 | 0.015305 |
| hsa-miR-7706      | 3.6323    | 15.1058    | up | 2.0561 | 0.017318 |
| hsa-miR-1290      | 0.5503    | 3.81395    | up | 2.7363 | 0.017994 |
| hsa-let-7a-5p     | 10.7867   | 41.6749    | up | 1.9499 | 0.018158 |
| hsa-miR-21-5p     | 1950.7475 | 6011.0948  | up | 1.6236 | 0.018331 |
| hsa-miR-16-2-3p   | 4.0175    | 16.3378    | up | 2.0238 | 0.018517 |
| hsa-miR-224-5p    | 72.095    | 284.6535   | up | 1.9812 | 0.018688 |
| hsa-miR-221-5p    | 69.7836   | 207.6245   | up | 1.573  | 0.019129 |
| hsa-miR-671-3p    | 1.2658    | 5.4102     | up | 2.0956 | 0.01997  |
| hsa-miR-185-3p    | 0         | 0.5892     | up | 5.8807 | 0.0219   |
| hsa-miR-1250-5p   | 0         | 0.5892     | up | 5.8807 | 0.0219   |
| hsa-miR-9-5p      | 0         | 0.5892     | up | 5.8807 | 0.0219   |
| hsa-miR-548aq-3p  | 0         | 0.6428     | up | 6.0063 | 0.0219   |
| hsa-miR-1246      | 5902.2135 | 34184.8779 | up | 2.534  | 0.032506 |
| hsa-miR-92a-3p    | 2.928378  | 16.957612  | up | 2.5338 | 0.032625 |
| hsa-miR-181a-2-3p | 0.7154    | 4.40854    | up | 2.5477 | 0.034755 |
| hsa-miR-10a-3p    | 0         | 0.5357     | up | 5.7434 | 0.034783 |
| hsa-miR-3928-3p   | 0         | 0.5357     | up | 5.7434 | 0.034783 |
| hsa-miR-130b-3p   | 0         | 0.5357     | up | 5.7434 | 0.034783 |
| hsa-miR-675-3p    | 0         | 0.5357     | up | 5.7434 | 0.034783 |
| hsa-miR-409-3p    | 0         | 0.5357     | up | 5.7434 | 0.034783 |
| hsa-miR-548ah-3p  | 0         | 0.5357     | up | 5.7434 | 0.034783 |
| hsa-miR-4497      | 12.1076   | 67.7083    | up | 2.4834 | 0.041802 |
| hsa-let-7b-3p     | 7.154     | 46.067     | up | 2.6869 | 0.04954  |

**Table S6** GSK3 $\beta$  was predicted as a putative miR-1246/27a-3p/92a-3p target through analysis of 4 public prediction databases.

| <b>miRNA</b>   | <b>Gene</b>  | <b>miRDB</b> | <b>miRTarBase</b> | <b>miRWalk</b> | <b>TargetScan</b> |
|----------------|--------------|--------------|-------------------|----------------|-------------------|
| hsa-miR-1246   | GSK3 $\beta$ | 0            | 0                 | 1              | 1                 |
| hsa-miR-27a-3p | GSK3 $\beta$ | 1            | 0                 | 1              | 1                 |
| hsa-miR-92b-3p | GSK3 $\beta$ | 0            | 1                 | 1              | 0                 |

**Table S7** Protein expression profile characteristic to Ex and Fn-Ex.

| Ex        |                                                                                        | Fn-Ex     |                                                                                        |
|-----------|----------------------------------------------------------------------------------------|-----------|----------------------------------------------------------------------------------------|
| Accession | Description                                                                            | Accession | Description                                                                            |
| P8160     | Basement membrane-specific heparan sulfate proteoglycan core protein [OS=Homo sapiens] | P98160    | Basement membrane-specific heparan sulfate proteoglycan core protein [OS=Homo sapiens] |
| P01023    | alpha-2-macroglobulin [OS=Homo sapiens]                                                | Q08380    | Galectin-3-binding protein [OS=Homo sapiens]                                           |
| P02675    | Fibrinogen beta chain [OS=Homo sapiens]                                                | P60709    | Actin, cytoplasmic 1 [OS=Homo sapiens]                                                 |
| P02671-1  | Fibrinogen alpha chain [OS=Homo sapiens]                                               | P62805    | histone H4 [OS=Homo sapiens]                                                           |
| P04114    | apolipoprotein B-100 [OS=Homo sapiens]                                                 | P62736    | Actin, aortic smooth muscle [OS=Homo sapiens]                                          |
| P02787    | Serotransferrin [OS=Homo sapiens]                                                      | P01023    | alpha-2-macroglobulin [OS=Homo sapiens]                                                |
| P21333    | Vitamin-A [OS=Homo sapiens]                                                            | P10909-2  | Isform 2 of Clusterin [OS=Homo sapiens]                                                |
| Q9Y490    | Talin-1 [OS=Homo sapiens]                                                              | P11142-1  | Heat shock cognate 71 kDa protein [OS=Homo sapiens]                                    |
| P02679-2  | Isform Gamma-A of Fibrinogen gamma chain [OS=Homo sapiens]                             | P16402    | Histone H1.3 [OS=Homo sapiens]                                                         |
| P0DOX5    | immunoglobulin gamma-1 heavy chain [OS=Homo sapiens]                                   | Q5QNW6-2  | Isform 2 of Histone H2B type 2-F [OS=Homo sapiens]                                     |
| P35579-1  | Myosin-9 [OS=Homo sapiens]                                                             | Q8WUM4-2  | Isform 2 of Programmed cell death 6-interacting protein [OS=Homo sapiens]              |
| P0C0L4-1  | Complement C3-A [OS=Homo sapiens]                                                      | P23527    | Histone H2B type 1-O [OS=Homo sapiens]                                                 |
| P02751    | fibronectin [OS=Homo sapiens]                                                          | P63104-1  | 14-3-3 protein zeta/delta [OS=Homo sapiens]                                            |
| P60709    | Actin, cytoplasmic 1 [OS=Homo sapiens]                                                 | P62979    | Ubiquitin-40S ribosomal protein S27a [OS=Homo sapiens]                                 |
| Q08380    | Galectin-3-binding protein [OS=Homo sapiens]                                           | POC058    | histone H2A type 1 [OS=Homo sapiens]                                                   |
| P01859    | Immunoglobulin heavy constant gamma 2 [OS=Homo sapiens]                                | Q08238    | Heat shock protein HSP 90-beta [OS=Homo sapiens]                                       |
| Q8WUM4    | Programmed cell death 6-interacting protein [OS=Homo sapiens]                          | Q9P2B2    | prostaglandin F2 receptor negative regulator [OS=Homo sapiens]                         |
| Q14517    | Protocadherin Fat 1 [OS=Homo sapiens]                                                  | P02533    | Keratin, type I cytoskeletal 14 [OS=Homo sapiens]                                      |
| Q00610-1  | Clathrin heavy chain 1 [OS=Homo sapiens]                                               | P01024    | Complement C3 [OS=Homo sapiens]                                                        |
| P01871-2  | Isform 2 of Immunoglobulin heavy constant mu [OS=Homo sapiens]                         | Q93077    | Histone H2A type 1-C [OS=Homo sapiens]                                                 |
| P01860    | Immunoglobulin heavy constant gamma 3 [OS=Homo sapiens]                                | P04083    | annexin A1 [OS=Homo sapiens]                                                           |
| P00450    | Ceruloplasmin [OS=Homo sapiens]                                                        | P06733-1  | alpha-enolase [OS=Homo sapiens]                                                        |
| Q9P2B2    | prostaglandin F2 receptor negative regulator [OS=Homo sapiens]                         | Q14517    | Protocadherin Fat 1 [OS=Homo sapiens]                                                  |
| P2805     | histone H4 [OS=Homo sapiens]                                                           | P39060-3  | Collagen alpha-1(XVII) chain [OS=Homo sapiens]                                         |
| P02774-3  | Isform 3 of Vitamin D-binding protein [OS=Homo sapiens]                                | P07996    | thrombospondin-1 [OS=Homo sapiens]                                                     |
| P01876    | immunoglobulin heavy constant alpha 1 [OS=Homo sapiens]                                | P02787    | Serotransferrin [OS=Homo sapiens]                                                      |
| P01834    | immunoglobulin kappa constant [OS=Homo sapiens]                                        | Q99715-1  | Collagen alpha-1(XII) chain [OS=Homo sapiens]                                          |
| P0DOX7    | immunoglobulin kappa light chain [OS=Homo sapiens]                                     | P0DMV8    | heat shock 70 kDa protein 1A [OS=Homo sapiens]                                         |
| P68032    | Actin, alpha cardiac muscle 1 [OS=Homo sapiens]                                        | P07900-2  | Isform 2 of Heat shock protein HSP 90-alpha [OS=Homo sapiens]                          |
| P01099-1  | alpha-1-antitrypsin [OS=Homo sapiens]                                                  | P16402    | Epithelial cell adhesion molecule [OS=Homo sapiens]                                    |
| P08238    | Heat shock protein HSP 90-beta [OS=Homo sapiens]                                       | Q94907    | Dickkopf-related protein 1 [OS=Homo sapiens]                                           |
| P07996    | thrombospondin-1 [OS=Homo sapiens]                                                     | P18065    | Insulin-like growth factor-binding protein 2 [OS=Homo sapiens]                         |
| P00738    | Haptoglobin [OS=Homo sapiens]                                                          | Q00391    | Sulfhydryl oxidase 1 [OS=Homo sapiens]                                                 |
| Q08431    | Lactadherin [OS=Homo sapiens]                                                          | P14618    | Pyruvate kinase PKM [OS=Homo sapiens]                                                  |
| P01861    | Immunoglobulin heavy constant gamma 4 [OS=Homo sapiens]                                | P08779    | Keratin, type I cytoskeletal 16 [OS=Homo sapiens]                                      |
| P02647    | Apolipoprotein A-I [OS=Homo sapiens]                                                   | P29241-2  | 40S ribosomal protein S8 [OS=Homo sapiens]                                             |
| P00747    | Plasminogen [OS=Homo sapiens]                                                          | Q06830    | peroxiredoxin-1 [OS=Homo sapiens]                                                      |
| P19823    | Inter-alpha-trypsin inhibitor heavy chain H2 [OS=Homo sapiens]                         | P68431    | Histone H3.1 [OS=Homo sapiens]                                                         |
| P14618    | Pyruvate kinase PKM [OS=Homo sapiens]                                                  | P00749    | Urokinase-type plasminogen activator [OS=Homo sapiens]                                 |
| P06396    | Gelsolin [OS=Homo sapiens]                                                             | P68363    | Tubulin alpha-1B chain [OS=Homo sapiens]                                               |
| P11442-1  | Heat shock cognate 71 kDa protein [OS=Homo sapiens]                                    | P02743-3  | Isform 3 of Vitamin D-binding protein [OS=Homo sapiens]                                |
| P04406-1  | glyceraldehyde-3-phosphate dehydrogenase [OS=Homo sapiens]                             | P02765    | Alpha-2-HS-glycoprotein [OS=Homo sapiens]                                              |
| P07437    | tubulin beta chain [OS=Homo sapiens]                                                   | P07355-2  | Isform 2 of Annexin A2 [OS=Homo sapiens]                                               |
| O14672    | Disintegrin and metalloproteinase domain-containing protein 10 [OS=Homo sapiens]       | P05556-1  | Integrin beta-1 [OS=Homo sapiens]                                                      |
| P07900-2  | Isform 2 of Heat shock protein HSP 90-alpha [OS=Homo sapiens]                          | P01034    | Cystatin-C [OS=Homo sapiens]                                                           |
| Q99715-1  | Collagen alpha-1(XII) chain [OS=Homo sapiens]                                          | P04406-1  | glyceraldehyde-3-phosphate dehydrogenase [OS=Homo sapiens]                             |
| P04003    | C4b-binding protein alpha chain [OS=Homo sapiens]                                      | P17087    | T-complex protein 1 subunit alpha [OS=Homo sapiens]                                    |
| P68371    | Tubulin beta-4B chain [OS=Homo sapiens]                                                | P07195    | L-lactate dehydrogenase B chain [OS=Homo sapiens]                                      |
| P68366    | Tubulin alpha-4A chain [OS=Homo sapiens]                                               | P12109    | Collagen alpha-1(VI) chain [OS=Homo sapiens]                                           |
| Q9BQE3    | Tubulin alpha-1C chain [OS=Homo sapiens]                                               | P48643    | T-complex protein 1 subunit epsilon [OS=Homo sapiens]                                  |
| P69905    | Hemoglobin subunit alpha [OS=Homo sapiens]                                             | P20742    | Pregnancy zone protein [OS=Homo sapiens]                                               |
| Q15748-1  | tubulin alpha-3C/D chain [OS=Homo sapiens]                                             | P08727    | Keratin, type I cytoskeletal 19 [OS=Homo sapiens]                                      |
| P0DOY2    | immunoglobulin lambda constant 2 [OS=Homo sapiens]                                     | P62801    | 40S ribosomal protein S11 [OS=Homo sapiens]                                            |
| P13639    | Elongation factor 2 [OS=Homo sapiens]                                                  | P16035    | Metalloproteinase inhibitor 2 [OS=Homo sapiens]                                        |
| P00734    | Prothrombin [OS=Homo sapiens]                                                          | P02545    | Prelamin-A/C [OS=Homo sapiens]                                                         |
| P05556-1  | Integrin beta-1 [OS=Homo sapiens]                                                      | P05787-2  | Isform 2 of Keratin, type II cytoskeletal 8 [OS=Homo sapiens]                          |
| P78371-1  | T-complex protein 1 subunit beta [OS=Homo sapiens]                                     | P01860    | Immunoglobulin heavy constant gamma 3 [OS=Homo sapiens]                                |
| Q6F113    | Histone H2A, type 2-A [OS=Homo sapiens]                                                | P01859    | Immunoglobulin heavy constant gamma 2 [OS=Homo sapiens]                                |
| Q5QNW6-2  | Isform 2 of Histone H2B type 2-F [OS=Homo sapiens]                                     | P29241-2  | Isform 2 of Elongation factor 1-delta [OS=Homo sapiens]                                |
| P20742    | Pregnancy zone protein [OS=Homo sapiens]                                               | P68104    | Elongation factor 1-alpha 1 [OS=Homo sapiens]                                          |
| P05787-2  | Isform 2 of Keratin, type II cytoskeletal 8 [OS=Homo sapiens]                          | P02679    | Fibrinogen gamma chain [OS=Homo sapiens]                                               |
| P10909-2  | Isform 2 of Clusterin [OS=Homo sapiens]                                                | Q86X29    | Lipolysis-stimulated lipoprotein receptor [OS=Homo sapiens]                            |
| P12109    | Collagen alpha-1(VI) chain [OS=Homo sapiens]                                           | P05452    | Tetranectin [OS=Homo sapiens]                                                          |
| Q2626     | peroxylase homolog [OS=Homo sapiens]                                                   | P15311    | Ezrin [OS=Homo sapiens]                                                                |
| P60033    | CD81 antigen [OS=Homo sapiens]                                                         | Q00560-1  | Systemin-1 [OS=Homo sapiens]                                                           |
| P00338-3  | Isform 3 of L-lactate dehydrogenase A chain [OS=Homo sapiens]                          | Q14764    | major vault protein [OS=Homo sapiens]                                                  |
| P07355-2  | Isform 2 of Annexin A2 [OS=Homo sapiens]                                               | P04075-2  | Isform 2 of Fructose-bisphosphate aldolase A [OS=Homo sapiens]                         |
| P16402    | Histone H1.3 [OS=Homo sapiens]                                                         | P01861    | Immunoglobulin heavy constant gamma 4 [OS=Homo sapiens]                                |
| P49527    | Fatty acid synthase [OS=Homo sapiens]                                                  | P69905    | Hemoglobin subunit alpha [OS=Homo sapiens]                                             |
| P29060-3  | Collagen alpha-1(XVII) chain [OS=Homo sapiens]                                         | Q43240    | Kallikrein-10 [OS=Homo sapiens]                                                        |
| O00560-1  | Systemin-1 [OS=Homo sapiens]                                                           | P0DOY3    | immunoglobulin lambda constant 3 [OS=Homo sapiens]                                     |
| P26006-1  | Isform 2 of Integrin alpha-3 [OS=Homo sapiens]                                         | P21741    | Midkine [OS=Homo sapiens]                                                              |
| P68871    | Hemoglobin subunit beta [OS=Homo sapiens]                                              | P50990    | T-complex protein 1 subunit theta [OS=Homo sapiens]                                    |
| Q94985-1  | Calsynin-1 [OS=Homo sapiens]                                                           | P00738    | Haptoglobin [OS=Homo sapiens]                                                          |
| P08514-1  | integrin alpha-1Ib [OS=Homo sapiens]                                                   | P09849    | High mobility group protein B1 [OS=Homo sapiens]                                       |
| P23527    | Histone H2B type 1-O [OS=Homo sapiens]                                                 | P49368-1  | T-complex protein 1 subunit gamma [OS=Homo sapiens]                                    |
| P19827-1  | Inter-alpha-trypsin inhibitor heavy chain H1 [OS=Homo sapiens]                         | Q99988    | Growth/differentiation factor 15 [OS=Homo sapiens]                                     |
| P0DOX8    | Immunoglobulin lambda-1 light chain [OS=Homo sapiens]                                  | P35579-1  | Myosin-9 [OS=Homo sapiens]                                                             |
| Q04695    | Keratin, type I cytoskeletal 17 [OS=Homo sapiens]                                      | P0DOX5    | immunoglobulin gamma-1 heavy chain [OS=Homo sapiens]                                   |
| P13010    | X-ray repair cross-complementing protein 5 [OS=Homo sapiens]                           | Q9GZM7-1  | Tubulointerstitial nephritis antigen-like [OS=Homo sapiens]                            |
| P05067-1  | Amyloid-beta A4 protein [OS=Homo sapiens]                                              | O14672    | Disintegrin and metalloproteinase domain-containing protein 10 [OS=Homo sapiens]       |
| Q14624-1  | Inter-alpha-trypsin inhibitor heavy chain H4 [OS=Homo sapiens]                         | Q94985-1  | Calsynin-1 [OS=Homo sapiens]                                                           |
| P63104-1  | 14-3-3 protein zeta/delta [OS=Homo sapiens]                                            | P09211    | Glutathione S-transferase P [OS=Homo sapiens]                                          |
| O15230    | Laminin subunit alpha-5 [OS=Homo sapiens]                                              | P10809    | 60 kDa heat shock protein, mitochondrial [OS=Homo sapiens]                             |
| P02790    | Hemopexin [OS=Homo sapiens]                                                            | P62937    | peptidyl-prolyl cis-trans isomerase A [OS=Homo sapiens]                                |
| P18206    | Vinculin [OS=Homo sapiens]                                                             | P05023    | Sodium/potassium-transporting ATPase subunit alpha-1 [OS=Homo sapiens]                 |
| P0DMV8    | heat shock 70 kDa protein 1A [OS=Homo sapiens]                                         | Q01650    | large neutral amino acids transporter small subunit 1 [OS=Homo sapiens]                |
| P12814-4  | Isform 4 of Alpha-actinin-1 [OS=Homo sapiens]                                          | P14027-1  | T-complex protein 1 subunit zeta [OS=Homo sapiens]                                     |
| P04908    | histone H2A type 1-B/E [OS=Homo sapiens]                                               | P17096-2  | Isform HMG-Y of High mobility group protein HMG-1/HMG-Y [OS=Homo sapiens]              |
| O43490-1  | Prominin-1 [OS=Homo sapiens]                                                           | Q8NBP7-1  | Proprotein convertase subtilisin/kexin type 9 [OS=Homo sapiens]                        |
| Q562R1    | Beta-actin-like protein 2 [OS=Homo sapiens]                                            | P07437    | tubulin beta chain [OS=Homo sapiens]                                                   |
| P17987    | T-complex protein 1 subunit alpha [OS=Homo sapiens]                                    | P0DOX7    | immunoglobulin kappa light chain [OS=Homo sapiens]                                     |
| P08133-1  | annexin A6 [OS=Homo sapiens]                                                           | P39023    | 60S ribosomal protein L3 [OS=Homo sapiens]                                             |
| P05106    | Integrin beta-3 [OS=Homo sapiens]                                                      | P29401-2  | Isform 2 of Transketolase [OS=Homo sapiens]                                            |
| P01033    | Metalloproteinase inhibitor 1 [OS=Homo sapiens]                                        | Q9NS15-1  | Latent-transforming growth factor beta-binding protein 3 [OS=Homo sapiens]             |
| P06733-1  | alpha-enolase [OS=Homo sapiens]                                                        | P12956    | X-ray repair cross-complementing protein 6 [OS=Homo sapiens]                           |
| P11387    | DNA topoisomerase 1 [OS=Homo sapiens]                                                  | P06748    | Nucleophosmin [OS=Homo sapiens]                                                        |
| P00558    | phosphoglycerate kinase 1 [OS=Homo sapiens]                                            | P13746-2  | Isform 2 of HLA class I histocompatibility antigen, A-11 alpha chain [OS=Homo sapiens] |
| P50990    | Integrin alpha-1 [OS=Homo sapiens]                                                     | P02751-15 | Isform 15 of Fibronectin [OS=Homo sapiens]                                             |
| Q9H4B7    | tubulin beta-1 chain [OS=Homo sapiens]                                                 | Q00610-1  | Clathrin heavy chain 1 [OS=Homo sapiens]                                               |
| O75340    | programmed cell death protein 6 [OS=Homo sapiens]                                      | P36578    | 60S ribosomal protein L4 [OS=Homo sapiens]                                             |
| P00739-2  | Isform 2 of Haptoglobin-related protein [OS=Homo sapiens]                              | P11047    | Laminin subunit gamma-1 [OS=Homo sapiens]                                              |
| P48643    | T-complex protein 1 subunit epsilon [OS=Homo sapiens]                                  | P06396    | Gelsolin [OS=Homo sapiens]                                                             |
| P16422    | Epithelial cell adhesion molecule [OS=Homo sapiens]                                    | P0DOX6    | immunoglobulin mu heavy chain [OS=Homo sapiens]                                        |
| P49368-1  | T-complex protein 1 subunit gamma [OS=Homo sapiens]                                    | P23528    | Cofilin-1 [OS=Homo sapiens]                                                            |
| Q14764    | major vault protein [OS=Homo sapiens]                                                  | P31947-1  | 14-3-3 protein sigma [OS=Homo sapiens]                                                 |
| P30443    | HLA class I histocompatibility antigen, A-1 alpha chain [OS=Homo sapiens]              | P15514    | Amphiregulin [OS=Homo sapiens]                                                         |
| Q969P0    | Immunoglobulin superfamily member 8 [OS=Homo sapiens]                                  | Q92520    | Protein FAM3C [OS=Homo sapiens]                                                        |
| Q9Y4K0    | Lysyl oxidase homolog 2 [OS=Homo sapiens]                                              | P00338-3  | Isform 3 of L-lactate dehydrogenase A chain [OS=Homo sapiens]                          |
| P01031    | Complement C5 [OS=Homo sapiens]                                                        | P01876    | immunoglobulin heavy constant alpha 1 [OS=Homo sapiens]                                |
| P15311    | Ezrin [OS=Homo sapiens]                                                                | P31431-1  | syndecan-4 [OS=Homo sapiens]                                                           |
| P62258-1  | 14-3-3 protein epsilon [OS=Homo sapiens]                                               | P0DOX8    | Immunoglobulin lambda-1 light chain [OS=Homo sapiens]                                  |
| P04083    | annexin A1 [OS=Homo sapiens]                                                           | P18124    | 60S ribosomal protein L7 [OS=Homo sapiens]                                             |
| P22392-2  | Isform 3 of Nucleoside diphosphate kinase B [OS=Homo sapiens]                          | P81605-2  | Isform 2 of Dermcidin [OS=Homo sapiens]                                                |
| P04075-2  | Isform 2 of Fructose-bisphosphate aldolase A [OS=Homo sapiens]                         | P60033    | CD81 antigen [OS=Homo sapiens]                                                         |
| P08195-4  | Isform 4 of 4F2 cell-surface antigen heavy chain [OS=Homo sapiens]                     | POC058    | Histone H2A.Z [OS=Homo sapiens]                                                        |
| P12956    | X-ray repair cross-complementing protein 6 [OS=Homo sapiens]                           | P31946    | 14-3-3 protein beta/alpha [OS=Homo sapiens]                                            |
| P55072    | Transitional endoplasmic reticulum ATPase [OS=Homo sapiens]                            | Q13444    | Disintegrin and metalloproteinase domain-containing protein 15 [OS=Homo sapiens]       |
| POC055    | Histone H2A.Z [OS=Homo sapiens]                                                        | Q86Y23    | Hormerin [OS=Homo sapiens]                                                             |
| P02649    | Apolipoprotein E [OS=Homo sapiens]                                                     | P04792    | Heat shock protein beta-1 [OS=Homo sapiens]                                            |
| Q5W5W15   | choline transporter-like protein 1 [OS=Homo sapiens]                                   | P60174    | Trisphosphate isomerase [OS=Homo sapiens]                                              |
| P01011-1  | Alpha-1-antitrypsin [OS=Homo sapiens]                                                  | P62363    | 40S ribosomal protein S14 [OS=Homo sapiens]                                            |
| P50991    | T-complex protein 1 subunit delta [OS=Homo sapiens]                                    | P16870    | Carboxypeptidase E [OS=Homo sapiens]                                                   |
| Q99832    | T-complex protein 1 subunit eta [OS=Homo sapiens]                                      | P18206    | Vinculin [OS=Homo sapiens]                                                             |
| P02765    | Alpha-2-HS-glycoprotein [OS=Homo sapiens]                                              | P06454-1  | Prothymosin alpha [OS=Homo sapiens]                                                    |
| P07093-3  | Isform 3 of Glia-derived nexin [OS=Homo sapiens]                                       | P61247    | 40S ribosomal protein S3a [OS=Homo sapiens]                                            |
| P16870    | Carboxypeptidase E [OS=Homo sapiens]                                                   | P27635    | 60S ribosomal protein L10 [OS=Homo sapiens]                                            |
| P29401-2  | Isform 2 of Transketolase [OS=Homo sapiens]                                            | Q13753-1  | Laminin subunit gamma-2 [OS=Homo sapiens]                                              |



|            |                                                                                         |          |                                                                                       |
|------------|-----------------------------------------------------------------------------------------|----------|---------------------------------------------------------------------------------------|
| P08519     | apolipoprotein(a) [OS=Homo sapiens]                                                     | Q8NS12   | arrestin domain-containing protein 1 [OS=Homo sapiens]                                |
| Q75531     | Barrier-to-autointegration factor [OS=Homo sapiens]                                     | P61026   | ras-related protein rab-10 [OS=Homo sapiens]                                          |
| P01008     | Antithrombin-III [OS=Homo sapiens]                                                      | P91033   | Metalloprotease inhibitor 1 [OS=Homo sapiens]                                         |
| A0MS06     | immunoglobulin lambda constant 7 [OS=Homo sapiens]                                      | P05783   | Keratin, type I cytoskeletal 18 [OS=Homo sapiens]                                     |
| Q9GZM7-1   | Tubulointerstitial nephritis antigen-like [OS=Homo sapiens]                             | P46782   | 40S ribosomal protein S5 [OS=Homo sapiens]                                            |
| Q99816     | tumor susceptibility gene 101 protein [OS=Homo sapiens]                                 | P36383   | gap junction gamma-1 protein [OS=Homo sapiens]                                        |
| O15240     | Neurosecretory protein VGF [OS=Homo sapiens]                                            | P02788   | Lactotransferrin [OS=Homo sapiens]                                                    |
| P05023     | Sodium/potassium-transporting ATPase subunit alpha-1 [OS=Homo sapiens]                  | P06867-1 | Amyloid-beta A4 protein [OS=Homo sapiens]                                             |
| P13805     | Inositol-like growth factor-binding protein 2 [OS=Homo sapiens]                         | Q92626   | peroxylase homolog [OS=Homo sapiens]                                                  |
| Q92520     | Protein FAM3C [OS=Homo sapiens]                                                         | P07737   | profilin-1 [OS=Homo sapiens]                                                          |
| P10319     | HLA class I histocompatibility antigen, B-58 alpha chain [OS=Homo sapiens]              | P62424   | 60S ribosomal protein L7a [OS=Homo sapiens]                                           |
| P21741     | Midkine [OS=Homo sapiens]                                                               | P63000-2 | Isoform B of Ras-related C3 botulinum toxin substrate 1 [OS=Homo sapiens]             |
| P62937     | peptidyl-prolyl cis-trans isomerase A [OS=Homo sapiens]                                 | P08670   | Vimentin [OS=Homo sapiens]                                                            |
| P01034     | Cystatin-C [OS=Homo sapiens]                                                            | Q07020   | 60S ribosomal protein L18 [OS=Homo sapiens]                                           |
| Q06033-1   | Inter-alpha-trypsin inhibitor heavy chain H3 [OS=Homo sapiens]                          | P35998   | 26S proteasome regulatory subunit 7 [OS=Homo sapiens]                                 |
| P60174     | Triosephosphate isomerase [OS=Homo sapiens]                                             | Q9H2A7   | C-X-C motif chemokine 16 [OS=Homo sapiens]                                            |
| P60900     | Proteasome subunit alpha type-6 [OS=Homo sapiens]                                       | P05204   | Non-histone chromosomal protein HMG-17 [OS=Homo sapiens]                              |
| O43866     | CD5 antigen-like [OS=Homo sapiens]                                                      | P13611   | Versican core protein [OS=Homo sapiens]                                               |
| P18463     | HLA class I histocompatibility antigen, B-37 alpha chain [OS=Homo sapiens]              | Q99832   | T-complex protein 1 subunit eta [OS=Homo sapiens]                                     |
| P17096-3   | Isoform HMG-R of High mobility group protein HMG-1/HMG-Y [OS=Homo sapiens]              | P01099-1 | alpha-1-antitrypsin [OS=Homo sapiens]                                                 |
| P07093-1   | Glia-derived nexin [OS=Homo sapiens]                                                    | Q5D862   | Filaggrin-2 [OS=Homo sapiens]                                                         |
| P02766     | Transthyretin [OS=Homo sapiens]                                                         | Q9Y5Y6   | suppressor of tumorigenicity 14 protein [OS=Homo sapiens]                             |
| P21926     | CD9 antigen [OS=Homo sapiens]                                                           | P27348   | 14-3-3 protein theta [OS=Homo sapiens]                                                |
| O14792     | Heparan sulfate glucosaminase 3-O-sulfotransferase 1 [OS=Homo sapiens]                  | P21926   | CD9 antigen [OS=Homo sapiens]                                                         |
| P13611     | Versican core protein [OS=Homo sapiens]                                                 | P35222   | Catenin beta-1 [OS=Homo sapiens]                                                      |
| P07737     | profilin-1 [OS=Homo sapiens]                                                            | Q02413   | Desmocollin-1 [OS=Homo sapiens]                                                       |
| P27918     | Properdin [OS=Homo sapiens]                                                             | P59665   | Neutrophil defensin 1 [OS=Homo sapiens]                                               |
| P07947     | tyrosine-protein kinase Yes [OS=Homo sapiens]                                           | Q75462   | Cytokine receptor-like factor 1 [OS=Homo sapiens]                                     |
| P08603-1   | complement factor H [OS=Homo sapiens]                                                   | Q14103   | heterogeneous nuclear ribonucleoprotein D0 [OS=Homo sapiens]                          |
| O43707     | Alpha-actinin-4 [OS=Homo sapiens]                                                       | Q14974   | Importin subunit beta-1 [OS=Homo sapiens]                                             |
| P02788     | Lactotransferrin [OS=Homo sapiens]                                                      | P62753   | 40S RIBOSOMAL PROTEIN S6 [OS=Homo sapiens]                                            |
| Q0NS15-1   | Latent-transforming growth factor beta-binding protein 3 [OS=Homo sapiens]              | P50991   | T-complex protein 1 subunit theta [OS=Homo sapiens]                                   |
| P00751-1   | Complement factor B [OS=Homo sapiens]                                                   | P22626   | heterogeneous nuclear ribonucleoproteins A2/B1 [OS=Homo sapiens]                      |
| P16189     | HLA class I histocompatibility antigen, A-31 alpha chain [OS=Homo sapiens]              | P29317   | Ephrin type-A receptor 2 [OS=Homo sapiens]                                            |
| P60660     | Myosin light polypeptide 6 [OS=Homo sapiens]                                            | P61981   | 14-3-3 protein gamma [OS=Homo sapiens]                                                |
| P29317     | Ephrin type-A receptor 2 [OS=Homo sapiens]                                              | P62844   | 40S ribosomal protein S15 [OS=Homo sapiens]                                           |
| P17301     | Integrin alpha-2 [OS=Homo sapiens]                                                      | P11166   | Solute carrier family 2, facilitated glucose transporter member 1 [OS=Homo sapiens]   |
| P07195     | L-lactate dehydrogenase B chain [OS=Homo sapiens]                                       | P04004   | Vitronectin [OS=Homo sapiens]                                                         |
| Q06830     | peroxiredoxin-1 [OS=Homo sapiens]                                                       | Q02818   | Nucleobindin-1 [OS=Homo sapiens]                                                      |
| P11047     | Laminin subunit gamma-1 [OS=Homo sapiens]                                               | P35443   | Thrombospondin-4 [OS=Homo sapiens]                                                    |
| P40227-1   | T-complex protein 1 subunit zeta [OS=Homo sapiens]                                      | P02675   | Fibrinogen beta chain [OS=Homo sapiens]                                               |
| P04217     | Alpha-1B-glycoprotein [OS=Homo sapiens]                                                 | Q9C0H2-4 | Isoform 4 of Protein twenty homolog 3 [OS=Homo sapiens]                               |
| P01981     | 14-3-3 protein gamma [OS=Homo sapiens]                                                  | Q91983-3 | Isoform 3 of Glia-derived nexin [OS=Homo sapiens]                                     |
| P50995     | axinin 1 [OS=Homo sapiens]                                                              | P01614   | Immunoglobulin kappa variable 2D-40 [OS=Homo sapiens]                                 |
| P07225     | Vitamin K-dependent protein S [OS=Homo sapiens]                                         | Q99816   | tumor susceptibility gene 101 protein [OS=Homo sapiens]                               |
| Q9Y5Y6     | suppressor of tumorigenicity 14 protein [OS=Homo sapiens]                               | Q9H4B7   | tubulin beta-1 chain [OS=Homo sapiens]                                                |
| P36383     | gap junction gamma-1 protein [OS=Homo sapiens]                                          | P61586   | Transforming protein RhoA [OS=Homo sapiens]                                           |
| P14923     | Junction plakoglobin [OS=Homo sapiens]                                                  | P16070   | CD44 antigen [OS=Homo sapiens]                                                        |
| P09972     | Fructose-bisphosphate aldolase C [OS=Homo sapiens]                                      | P06576   | ATP synthase subunit 6, mitochondrial [OS=Homo sapiens]                               |
| P06727     | Apolipoprotein A-IV [OS=Homo sapiens]                                                   | P02671-1 | Fibrinogen alpha chain [OS=Homo sapiens]                                              |
| P52907     | F-actin-capping protein subunit alpha-1 [OS=Homo sapiens]                               | P00734   | Prothrombin [OS=Homo sapiens]                                                         |
| Q13421-2   | Isoform 3 of Mesothelin [OS=Homo sapiens]                                               | P26006-1 | Isoform 2 of Integrin alpha-3 [OS=Homo sapiens]                                       |
| P01614     | Immunoglobulin kappa variable 2D-40 [OS=Homo sapiens]                                   | Q9BSG5-2 | Isoform 2 of Retbindin [OS=Homo sapiens]                                              |
| Q8NS251    | Latent-transforming growth factor beta-binding protein 4 [OS=Homo sapiens]              | P62771   | Alpha-fetoprotein [OS=Homo sapiens]                                                   |
| P16035     | Metalloprotease inhibitor 2 [OS=Homo sapiens]                                           | P02788   | Retinol-binding protein 4 [OS=Homo sapiens]                                           |
| P68104     | Elongation factor 1-alpha [OS=Homo sapiens]                                             | P61254   | 60S ribosomal protein L26 [OS=Homo sapiens]                                           |
| P16144-1   | Integrin beta-4 [OS=Homo sapiens]                                                       | P14625   | Endoplasmic [OS=Homo sapiens]                                                         |
| A6NH12-1   | Tubulin alpha chain-like 3 [OS=Homo sapiens]                                            | Q9Y4K0   | Lysyl oxidase homolog 2 [OS=Homo sapiens]                                             |
| P01619     | Immunoglobulin kappa variable 3-20 [OS=Homo sapiens]                                    | P46779-3 | Isoform 3 of 60S ribosomal protein L28 [OS=Homo sapiens]                              |
| P10321     | HLA class I histocompatibility antigen, Cw-7 alpha chain [OS=Homo sapiens]              | P62844   | 60S ribosomal protein L32 [OS=Homo sapiens]                                           |
| P02652     | Apolipoprotein A-II [OS=Homo sapiens]                                                   | P46776   | 60S ribosomal protein L27a [OS=Homo sapiens]                                          |
| P11021     | 78 kDa glucose-regulated protein [OS=Homo sapiens]                                      | P07225   | Vitamin K-dependent protein S [OS=Homo sapiens]                                       |
| Q71D13     | histone H3.2 [OS=Homo sapiens]                                                          | P3246-1  | splicing factor, proline- and glutamine-rich [OS=Homo sapiens]                        |
| P18669     | Phosphoglycerate mutase 1 [OS=Homo sapiens]                                             | Q02878   | 60S ribosomal protein L6 [OS=Homo sapiens]                                            |
| Q02809-2   | Isoform 2 of Procollagen-lysine-2-oxoglutarate 5-dioxygenase 1 [OS=Homo sapiens]        | P13639   | Elongation factor 2 [OS=Homo sapiens]                                                 |
| P33908     | Mannosyl-oligosaccharide 1,2-alpha-mannosidase IA [OS=Homo sapiens]                     | Q91494   | Vascular protein sorting-associated protein 37B [OS=Homo sapiens]                     |
| Q8TAA3-1   | proteasome subunit alpha type-3-like [OS=Homo sapiens]                                  | P01598   | Eukaryotic translation initiation factor 2 subunit 1 [OS=Homo sapiens]                |
| Q6YHK3-1   | CD109 antigen [OS=Homo sapiens]                                                         | Q8NG11-1 | Tetraspanin-14 [OS=Homo sapiens]                                                      |
| P26641-2   | Isoform 2 of Elongation factor 1-gamma [OS=Homo sapiens]                                | Q9Y265   | RuvB-like 1 [OS=Homo sapiens]                                                         |
| O60716-1   | Catenin delta-1 [OS=Homo sapiens]                                                       | P02452   | Collagen alpha-1(I) chain [OS=Homo sapiens]                                           |
| P53396-1   | ATP-citrate synthase [OS=Homo sapiens]                                                  | Q75347   | Tubulin-specific chaperone A [OS=Homo sapiens]                                        |
| A0A0C4DH15 | Immunoglobulin kappa variable 3D-20 [OS=Homo sapiens]                                   | P49147   | Carboxyl-terminal domain protein [OS=Homo sapiens]                                    |
| Q8NS12     | arrestin domain-containing protein 1 [OS=Homo sapiens]                                  | P05156   | Complement factor I [OS=Homo sapiens]                                                 |
| Q01518-1   | adenylyl cyclase-associated protein 1 [OS=Homo sapiens]                                 | Q00299   | chloride intracellular channel protein 1 [OS=Homo sapiens]                            |
| P02776     | Platelet factor 4 [OS=Homo sapiens]                                                     | A5D8V6   | Vacuolar protein sorting-associated protein 37C [OS=Homo sapiens]                     |
| P07942     | Laminin subunit beta-1 [OS=Homo sapiens]                                                | P42677   | 40S ribosomal protein S27 [OS=Homo sapiens]                                           |
| Q89362     | Catenin 1 [OS=Homo sapiens]                                                             | P26733-1 | 60S ribosomal protein L13 [OS=Homo sapiens]                                           |
| P5YV32     | BRO1 domain-containing protein BROX [OS=Homo sapiens]                                   | Q13200   | 26S proteasome non-ATPase regulatory subunit 2 [OS=Homo sapiens]                      |
| Q8NB97-1   | Prooprotein convertase subtilisin/kexin type 9 [OS=Homo sapiens]                        | P08195-4 | Isoform 4 of 4F2 cell-surface antigen heavy chain [OS=Homo sapiens]                   |
| Q14118     | Dystroglycan [OS=Homo sapiens]                                                          | Q57749   | Keratinocyte proline-rich protein [OS=Homo sapiens]                                   |
| P63241-2   | Isoform 2 of Eukaryotic translation initiation factor 5A-1 [OS=Homo sapiens]            | P07910-1 | Heterogeneous nuclear ribonucleoproteins C1/C2 [OS=Homo sapiens]                      |
| Q05639     | Elongation factor 1-alpha [OS=Homo sapiens]                                             | P07305   | Histone H1.0 [OS=Homo sapiens]                                                        |
| Q13418     | Interleukin-like protein kinase [OS=Homo sapiens]                                       | P08697-1 | Alpha-2-antiplasmin [OS=Homo sapiens]                                                 |
| P23284     | peptidyl-prolyl cis-trans isomerase B [OS=Homo sapiens]                                 | P52565-1 | tau-GDP-dissociation inhibitor 1 [OS=Homo sapiens]                                    |
| P04004     | Vitronectin [OS=Homo sapiens]                                                           | P02461   | Collagen alpha-1(III) chain [OS=Homo sapiens]                                         |
| Q14766-4   | Isoform 4 of Latent-transforming growth factor beta-binding protein 1 [OS=Homo sapiens] | P01591   | Immunoglobulin J chain [OS=Homo sapiens]                                              |
| P02747     | Complement C1q subcomponent subunit C [OS=Homo sapiens]                                 | P68371   | Tubulin beta-4B chain [OS=Homo sapiens]                                               |
| Q9H4M9     | EH domain-containing protein 1 [OS=Homo sapiens]                                        | Q51WF2-1 | Guanine nucleotide-binding protein G(S) subunit alpha isoforms XLas [OS=Homo sapiens] |
| P06753     | Tropomyosin alpha-1 chain [OS=Homo sapiens]                                             | Q75787-1 | Retin receptor [OS=Homo sapiens]                                                      |
| Q13201     | Multimerin-1 [OS=Homo sapiens]                                                          | P01008   | Antithrombin-III [OS=Homo sapiens]                                                    |
| Q13200     | 26S proteasome non-ATPase regulatory subunit 2 [OS=Homo sapiens]                        | P55001   | Microfibrillar-associated protein 2 [OS=Homo sapiens]                                 |
| P00736     | Complement C1r subcomponent [OS=Homo sapiens]                                           | P13521   | Secretogranin-2 [OS=Homo sapiens]                                                     |
| Q9UK41-2   | Isoform 2 of Vacuolar protein sorting-associated protein 28 homolog [OS=Homo sapiens]   | P61769   | Beta-2-microglobulin [OS=Homo sapiens]                                                |
| P06756     | Integrin alpha-V [OS=Homo sapiens]                                                      | P62318   | small nuclear ribonucleoprotein sm d3 [OS=Homo sapiens]                               |
| Q75083     | WD repeat-containing protein 1 [OS=Homo sapiens]                                        | P19127-1 | Inter-alpha-trypsin inhibitor heavy chain III [OS=Homo sapiens]                       |
| P16070     | CD44 antigen [OS=Homo sapiens]                                                          | P51148-2 | Isoform 2 of Ras-related protein Rab-SC [OS=Homo sapiens]                             |
| Q6UWPS-1   | Suprabasin [OS=Homo sapiens]                                                            | Q86VE9-4 | Isoform 4 of Serine incorporator 5 [OS=Homo sapiens]                                  |
| Q14974     | Importin subunit beta-1 [OS=Homo sapiens]                                               | P23396-2 | Isoform 2 of 40S ribosomal protein S3 [OS=Homo sapiens]                               |
| Q06481     | Amyloid-like protein 2 [OS=Homo sapiens]                                                | P15880   | 40S ribosomal protein S2 [OS=Homo sapiens]                                            |
| P28066-1   | Proteasome subunit alpha type-5 [OS=Homo sapiens]                                       | P62888   | 60S ribosomal protein L30 [OS=Homo sapiens]                                           |
| P62979     | Ubiquitin-40S ribosomal protein S27a [OS=Homo sapiens]                                  | P23090   | 40S ribosomal protein S4, gamma isoform 1 [OS=Homo sapiens]                           |
| Q99988     | Growth/differentiation factor 15 [OS=Homo sapiens]                                      | P30041   | Peroxiredoxin-6 [OS=Homo sapiens]                                                     |
| P25787     | Proteasome subunit alpha type-2 [OS=Homo sapiens]                                       | P16949-2 | Isoform 2 of Stathmin [OS=Homo sapiens]                                               |
| P23142     | Fibulin-1 [OS=Homo sapiens]                                                             | P39019   | 40S ribosomal protein S19 [OS=Homo sapiens]                                           |
| P32613     | Basigin [OS=Homo sapiens]                                                               | P02652   | Apolipoprotein A-II [OS=Homo sapiens]                                                 |
| Q14275     | Von Willebrand factor [OS=Homo sapiens]                                                 | Q15828-1 | Cystatin-M [OS=Homo sapiens]                                                          |
| P28074-1   | proteasome subunit beta type-5 [OS=Homo sapiens]                                        | Q40925-3 | Isoform 3 of Malate dehydrogenase, cytoplasmic [OS=Homo sapiens]                      |
| P19338     | Nucleolin [OS=Homo sapiens]                                                             | P34096   | Ribonuclease 4 [OS=Homo sapiens]                                                      |
| Q00391     | Sulfhydryl oxidase 1 [OS=Homo sapiens]                                                  | P20618   | proteasome subunit beta type-1 [OS=Homo sapiens]                                      |
| Q13443     | disintegrin and metalloprotease domain-containing protein 9 [OS=Homo sapiens]           | P14649   | Myosin light chain 6B [OS=Homo sapiens]                                               |
| Q00299     | chloride intracellular channel protein 1 [OS=Homo sapiens]                              | P08693-1 | complement factor H [OS=Homo sapiens]                                                 |
| P21579     | Synaptotagmin-1 [OS=Homo sapiens]                                                       | P71259   | Coagulation factor V [OS=Homo sapiens]                                                |
| Q00468-7   | Isoform 7 of Agrin [OS=Homo sapiens]                                                    | P50914   | 60S ribosomal protein L14 [OS=Homo sapiens]                                           |
| P48960-1   | CD97 antigen [OS=Homo sapiens]                                                          | P26641-2 | Isoform 2 of Elongation factor 1-gamma [OS=Homo sapiens]                              |
| Q6PCB0     | von Willebrand factor A domain-containing protein 1 [OS=Homo sapiens]                   | Q15019-2 | Isoform 2 of Septin-2 [OS=Homo sapiens]                                               |
| P09429     | High mobility group protein B1 [OS=Homo sapiens]                                        | P0C0L4-1 | Complement C-4A [OS=Homo sapiens]                                                     |
| P06953     | Cell division control protein 42 homolog [OS=Homo sapiens]                              | P62626   | GTP-binding nuclear protein RAN [OS=Homo sapiens]                                     |
| Q03873-3   | Isoform 3 of NADH-cytochrome b5 reductase 3 [OS=Homo sapiens]                           | Q14624-1 | Ras-related protein Rap-1b [OS=Homo sapiens]                                          |
| P55001     | Microfibrillar-associated protein 2 [OS=Homo sapiens]                                   | P61224-1 | Ras-related protein Rap-1b [OS=Homo sapiens]                                          |
| O60635     | Tetraspanin-1 [OS=Homo sapiens]                                                         | Q5SSJ5-1 | Heterochromatin protein 1-binding protein 3 [OS=Homo sapiens]                         |
| P61769     | Beta-2-microglobulin [OS=Homo sapiens]                                                  | Q8NSB9-1 | Thioredoxin domain-containing protein 5 [OS=Homo sapiens]                             |
| Q99985     | Semaphorin-3C [OS=Homo sapiens]                                                         | P55058   | phospholipid transfer protein [OS=Homo sapiens]                                       |
| P06310     | Immunoglobulin kappa variable 2-3 [OS=Homo sapiens]                                     | P47914   | 60S ribosomal protein L29 [OS=Homo sapiens]                                           |
| Q13308-6   | Isoform 6 of Inactive tyrosine-protein kinase 7 [OS=Homo sapiens]                       | P61313-1 | 60S ribosomal protein L15 [OS=Homo sapiens]                                           |
| P12931-2   | Isoform 2 of Proto-oncogene tyrosine-protein kinase Src [OS=Homo sapiens]               | P09382   | Galectin-1 [OS=Homo sapiens]                                                          |
| Q14697-2   | Isoform 2 of Neutral alpha-glucosidase AB [OS=Homo sapiens]                             | Q99436   | Proteasome subunit beta type-7 [OS=Homo sapiens]                                      |
| P25786-2   | Isoform Long of Proteasome subunit alpha type-1 [OS=Homo sapiens]                       | P10145   | interleukin-8 [OS=Homo sapiens]                                                       |
| P02746     | Complement C1q subcomponent subunit B [OS=Homo sapiens]                                 | P62851   | 40S ribosomal protein S25 [OS=Homo sapiens]                                           |
| P28692-2   | Isoform 2 of Elongation factor 1-delta [OS=Homo sapiens]                                | P28072   | Proteasome subunit beta type-6 [OS=Homo sapiens]                                      |
| P01591     | Immunoglobulin J chain [OS=Homo sapiens]                                                | P07947   | tyrosine-protein kinase Yes [OS=Homo sapiens]                                         |
| Q92876-1   | Kallikrein-6 [OS=Homo sapiens]                                                          | P21583-1 | Kit ligand [OS=Homo sapiens]                                                          |
| P49411     | elongation factor Tu, mitochondrial [OS=Homo sapiens]                                   | P23142   | Fibulin-1 [OS=Homo sapiens]                                                           |



|            |                                                                                                 |          |                                                                                                                |
|------------|-------------------------------------------------------------------------------------------------|----------|----------------------------------------------------------------------------------------------------------------|
| Q14152     | Eukaryotic translation initiation factor 3 subunit A [OS=Homo sapiens]                          | P62588-1 | 14-3-3 protein epsilon [OS=Homo sapiens]                                                                       |
| P23526-1   | Adenosylhomocysteinase [OS=Homo sapiens]                                                        | P78371-1 | F-complex protein 1 subunit beta [OS=Homo sapiens]                                                             |
| P06748     | Nucleosom [OS=Homo sapiens]                                                                     | P19021-5 | Isomorph 5 of Peptidyl-glycine alpha-amidating monooxygenase [OS=Homo sapiens]                                 |
| P01042     | kininogen-1 [OS=Homo sapiens]                                                                   | P02749   | Beta-2-glycoprotein 1 [OS=Homo sapiens]                                                                        |
| Q12906-7   | Isomorph 7 of Interleukin enhancer-binding factor 3 [OS=Homo sapiens]                           | Q07955-2 | Isomorph ASF-2 of Serine/arginine-rich splicing factor 1 [OS=Homo sapiens]                                     |
| Q13753-1   | Laminin subunit gamma-2 [OS=Homo sapiens]                                                       | P62277   | 40S ribosomal protein S13 [OS=Homo sapiens]                                                                    |
| P13497     | Bone morphogenetic protein 1 [OS=Homo sapiens]                                                  | Q096RF0  | Sorbin nexin-18 [OS=Homo sapiens]                                                                              |
| P11166     | Solute carrier family 2, facilitated glucose transporter member 1 [OS=Homo sapiens]             | P61353   | 60S ribosomal protein L27 [OS=Homo sapiens]                                                                    |
| Q43657     | Tetraspanin-6 [OS=Homo sapiens]                                                                 | P14174   | Macrophage Migration Inhibitory Factor [OS=Homo sapiens]                                                       |
| P61204     | ADP-ribosylation factor 3 [OS=Homo sapiens]                                                     | P57721-1 | Polyr(C)-binding protein 3 [OS=Homo sapiens]                                                                   |
| P05546     | Heparin cofactor 2 [OS=Homo sapiens]                                                            | P60866-2 | Isomorph 2 of 40S ribosomal protein S20 [OS=Homo sapiens]                                                      |
| Q9H013-1   | Disintegrin and metalloproteinase domain-containing protein 19 [OS=Homo sapiens]                | P31943   | Heterogeneous nuclear ribonucleoprotein H [OS=Homo sapiens]                                                    |
| P25705-1   | ATP synthase subunit alpha, mitochondrial [OS=Homo sapiens]                                     | P19823   | Inter-alpha-trypsin inhibitor heavy chain H2 [OS=Homo sapiens]                                                 |
| Q13740-1   | CD166 antigen [OS=Homo sapiens]                                                                 | P02790   | Hemopexin [OS=Homo sapiens]                                                                                    |
| Q75367-1   | Core histone H2A.1 [OS=Homo sapiens]                                                            | Q76061   | Stannocalcin-2 [OS=Homo sapiens]                                                                               |
| P08134     | Rho-related GTP-binding protein RhoC [OS=Homo sapiens]                                          | Q02809-2 | Isomorph 2 of Procollagen-lysine-2-oxoglutarate 5-dioxygenase 1 [OS=Homo sapiens]                              |
| P62873     | Guanine nucleotide-binding protein G(i)/G(s)/G(t) subunit beta-1 [OS=Homo sapiens]              | P35268   | 60S ribosomal protein L22 [OS=Homo sapiens]                                                                    |
| Q9BRK5-1   | 45 kDa calcium-binding protein [OS=Homo sapiens]                                                | P32384   | peptidyl-prolyl cis-trans isomerase B [OS=Homo sapiens]                                                        |
| P67809     | Nuclease-sensitive element-binding protein 1 [OS=Homo sapiens]                                  | Q9Y490   | Talin-1 [OS=Homo sapiens]                                                                                      |
| Q9UCM3-9   | Isomorph 9 of Deleted in malignant brain tumor 1 protein [OS=Homo sapiens]                      | P00747   | Plasminogen [OS=Homo sapiens]                                                                                  |
| P04792     | Heat shock protein beta-1 [OS=Homo sapiens]                                                     | P14923   | Junction plakoglobin [OS=Homo sapiens]                                                                         |
| P09211     | Glutathione S-transferase P [OS=Homo sapiens]                                                   | P63220   | 40S ribosomal protein S21 [OS=Homo sapiens]                                                                    |
| Q14126     | Desmoglein-2 [OS=Homo sapiens]                                                                  | Q9UK73   | Protein fem-1 homolog B [OS=Homo sapiens]                                                                      |
| P31011     | Protein disulfide-isomerase A3 [OS=Homo sapiens]                                                | Q05782   | AP-2 complex subunit alpha-1 [OS=Homo sapiens]                                                                 |
| P04196     | Histidine-rich glycoprotein [OS=Homo sapiens]                                                   | Q9H444   | Charged multivesicular body protein 4b [OS=Homo sapiens]                                                       |
| Q04899-4   | Isomorph 4 of Guanine nucleotide-binding protein G(i) subunit alpha-2 [OS=Homo sapiens]         | P61353   | 60S ribosomal protein L28 [OS=Homo sapiens]                                                                    |
| P35222     | Catenin beta-1 [OS=Homo sapiens]                                                                | P38881   | 60S ribosomal protein L36a [OS=Homo sapiens]                                                                   |
| P78539-1   | Sushi repeat-containing protein SRPX [OS=Homo sapiens]                                          | P55072   | Transitional endoplasmic reticulum ATPase [OS=Homo sapiens]                                                    |
| Q06EY5-1   | Multivesicular body subunit 12A [OS=Homo sapiens]                                               | P02647   | Apolipoprotein A-I [OS=Homo sapiens]                                                                           |
| P01624     | Immunoglobulin kappa variable 3-15 [OS=Homo sapiens]                                            | Q9H421-1 | Charged multivesicular body protein 1a [OS=Homo sapiens]                                                       |
| P07249     | Beta-2-glycoprotein 1 [OS=Homo sapiens]                                                         | Q9NRY6   | Phospholipid scramblase 3 [OS=Homo sapiens]                                                                    |
| P03537     | Complement component C8 alpha chain [OS=Homo sapiens]                                           | Q9ME19   | eukaryotic translation initiation factor 3 subunit C-like protein [OS=Homo sapiens]                            |
| Q096PD5-2  | Isomorph 2 of N-acetylmuramoyl-L-alanine amidase [OS=Homo sapiens]                              | Q15631-1 | Translin [OS=Homo sapiens]                                                                                     |
| P12259     | Coagulation factor V [OS=Homo sapiens]                                                          | Q09570   | Fibroblast growth factor 19 [OS=Homo sapiens]                                                                  |
| P09871     | Complement C1s subcomponent [OS=Homo sapiens]                                                   | P01114   | apolipoprotein B-100 [OS=Homo sapiens]                                                                         |
| Q75674     | TOPI-like protein 1 [OS=Homo sapiens]                                                           | Q09874   | Poly [ADP-ribose] polymerase 1 [OS=Homo sapiens]                                                               |
| Q06028     | sodium-coupled neutral amino acid transporter 2 [OS=Homo sapiens]                               | Q09966-6 | Isomorph 6 of A kinase anchoring protein 9 [OS=Homo sapiens]                                                   |
| P54709     | sodium/potassium-transporting ATPase subunit beta-3 [OS=Homo sapiens]                           | P46777   | 60S ribosomal protein L5 [OS=Homo sapiens]                                                                     |
| Q09ULF5    | Zinc transporter ZIP10 [OS=Homo sapiens]                                                        | P84988   | 60S ribosomal protein L19 [OS=Homo sapiens]                                                                    |
| P62879     | Guanine nucleotide-binding protein G(i)/G(s)/G(t) subunit beta-2 [OS=Homo sapiens]              | Q8R5X6   | 10 kDa chaperonin OS=Fusobacterium nucleatum (strain ATCC 25586)                                               |
| P68400     | Casein kinase II subunit alpha [OS=Homo sapiens]                                                | Q8RG30   | Glutamate dehydrogenase OS=Fusobacterium nucleatum (strain ATCC 25586)                                         |
| P21589-1   | S-nucleotidase [OS=Homo sapiens]                                                                | Q8R5X7   | 60 kDa chaperonin OS=Fusobacterium nucleatum (strain ATCC 25586)                                               |
| Q8WAS-2    | Isomorph 2 of Cholerae transporter-like protein 2 [OS=Homo sapiens]                             | Q8R643   | Prokaryotic translation initiation factor 3 subunit C [OS=Homo sapiens]                                        |
| Q09873     | protein arginine N-methyltransferase 1 [OS=Homo sapiens]                                        | Q8RE55   | 5-hydroxybutyryl-CoA dehydrogenase OS=Fusobacterium nucleatum (strain ATCC 25586)                              |
| Q8IUL8     | Cartilage intermediate layer protein 2 [OS=Homo sapiens]                                        | Q8RIN6   | Acyl-CoA dehydrogenase, short-chain specific OS=Fusobacterium nucleatum (strain ATCC 25586)                    |
| P31089     | Neurotensin receptor type 1 [OS=Homo sapiens]                                                   | Q8RI55   | Enolase OS=Fusobacterium nucleatum (strain ATCC 25586)                                                         |
| P10809     | 60 kDa heat shock protein, mitochondrial [OS=Homo sapiens]                                      | Q8RFC6   | Electron transfer flavoprotein alpha-subunit OS=Fusobacterium nucleatum (strain ATCC 25586)                    |
| Q15149-1   | plectin [OS=Homo sapiens]                                                                       | Q8R6D3   | Alkyl hydroperoxide reductase C22 protein OS=Fusobacterium nucleatum (strain ATCC 25586)                       |
| Q15427     | Monoacylglycerol transporter 4 [OS=Homo sapiens]                                                | Q8R6D3   | Elongation factor Tu OS=Fusobacterium nucleatum (strain ATCC 25586)                                            |
| Q05297-1   | Myelin protein zero-like protein 1 [OS=Homo sapiens]                                            | Q8RH06   | Tryptophanase OS=Fusobacterium nucleatum (strain ATCC 25586)                                                   |
| Q12907     | Vesicular integral-membrane protein VIP36 [OS=Homo sapiens]                                     | Q8R600   | Elongation factor Ts OS=Fusobacterium nucleatum (strain ATCC 25586)                                            |
| P18428     | lipopolysaccharide-binding protein [OS=Homo sapiens]                                            | Q8RG24   | Acetyl-CoA acetyltransferase OS=Fusobacterium nucleatum (strain ATCC 25586)                                    |
| P55268     | laminin subunit beta-2 [OS=Homo sapiens]                                                        | Q8RHNO   | Thioredoxin reductase OS=Fusobacterium nucleatum (strain ATCC 25586)                                           |
| Q0C0H2-4   | Isomorph 4 of Protein tweety homolog 3 [OS=Homo sapiens]                                        | Q8REJ2   | D-azalactone-binding protein OS=Fusobacterium nucleatum (strain ATCC 25586)                                    |
| P23528     | Cadherin-1 [OS=Homo sapiens]                                                                    | Q8R600   | Uncharacterized protein OS=Fusobacterium nucleatum (strain ATCC 25586)                                         |
| P02771     | Alpha-fetoprotein [OS=Homo sapiens]                                                             | Q8RFN9   | Glyceroldehyde-3-phosphate dehydrogenase OS=Fusobacterium nucleatum (strain ATCC 25586)                        |
| Q9UN37     | Vacuolar protein sorting-associated protein 4A [OS=Homo sapiens]                                | Q8RF98   | DNA-binding protein HU OS=Fusobacterium nucleatum (strain ATCC 25586)                                          |
| P40926     | Malate dehydrogenase, mitochondrial [OS=Homo sapiens]                                           | Q8RI44   | Uncharacterized protein OS=Fusobacterium nucleatum (strain ATCC 25586)                                         |
| P07237     | Protein disulfide-isomerase [OS=Homo sapiens]                                                   | Q8RH05   | Chaperone protein DnaK OS=Fusobacterium nucleatum (strain ATCC 25586)                                          |
| Q06576     | ATP synthase subunit beta, mitochondrial [OS=Homo sapiens]                                      | Q8RF69   | Uncharacterized protein OS=Fusobacterium nucleatum (strain ATCC 25586)                                         |
| Q15828     | Cytochrome-M [OS=Homo sapiens]                                                                  | Q8R608   | Serine protease OS=Fusobacterium nucleatum (strain ATCC 25586)                                                 |
| P59190-1   | Ras-related protein Rab-15 [OS=Homo sapiens]                                                    | Q8RFC7   | Electron transfer flavoprotein beta-subunit OS=Fusobacterium nucleatum (strain ATCC 25586)                     |
| P78417     | Glutathione S-transferase omega-1 [OS=Homo sapiens]                                             | Q8RD19   | Threonine dehydratase OS=Fusobacterium nucleatum (strain ATCC 25586)                                           |
| Q75636-1   | Ficolin-3 [OS=Homo sapiens]                                                                     | Q8RED7   | Acetate kinase OS=Fusobacterium nucleatum (strain ATCC 25586)                                                  |
| Q14950     | Myosin regulatory light chain 12B [OS=Homo sapiens]                                             | Q8RH18   | Probable cytosol aminopeptidase OS=Fusobacterium nucleatum (strain ATCC 25586)                                 |
| Q0Y024     | Junctonal adhesion molecule A [OS=Homo sapiens]                                                 | Q8RH43   | Uncharacterized protein OS=Fusobacterium nucleatum (strain ATCC 25586)                                         |
| P25788-1   | Proteasome subunit alpha type-3 [OS=Homo sapiens]                                               | Q8RH33   | Acetoacetate/butyrate/acetoac:oxymy: A transferase OS=Fusobacterium nucleatum (strain ATCC 25586)              |
| P28072     | Proteasome subunit beta type-6 [OS=Homo sapiens]                                                | Q8RH1Y   | Major outer membrane protein OS=Fusobacterium nucleatum (strain ATCC 25586)                                    |
| Q8NEJ5     | Retinoic acid-induced protein 3 [OS=Homo sapiens]                                               | Q8RIIF3  | Uncharacterized protein OS=Fusobacterium nucleatum (strain ATCC 25586)                                         |
| Q15185     | Prostaglandin E synthase 3 [OS=Homo sapiens]                                                    | Q8RE11   | Acetoacetate metabolism regulatory protein atoC OS=Fusobacterium nucleatum (strain ATCC 25586)                 |
| Q03084-5   | Isomorph SERCA3E of Sarcolemmal/endoplasmic reticulum calcium ATPase 3 [OS=Homo sapiens]        | Q8RG58   | Glutaconyl-CoA decarboxylase A subunit OS=Fusobacterium nucleatum (strain ATCC 25586)                          |
| Q86829     | Lipid-stimulated tyrosine phosphatase [OS=Homo sapiens]                                         | Q8RH05   | Uncharacterized protein OS=Fusobacterium nucleatum (strain ATCC 25586)                                         |
| P31947-1   | 14-3-3 protein sigma [OS=Homo sapiens]                                                          | Q8RH08   | Chaperone protein CtpB OS=Fusobacterium nucleatum (strain ATCC 25586)                                          |
| Q00151     | PDZ and LIM domain protein 1 [OS=Homo sapiens]                                                  | Q8RH4F   | Formate-tetrahydrofolate ligase OS=Fusobacterium nucleatum (strain ATCC 25586)                                 |
| Q9H9H4     | Vacuolar protein sorting-associated protein 37B [OS=Homo sapiens]                               | Q8RE65   | C4-dicarboxylate-binding protein OS=Fusobacterium nucleatum (strain ATCC 25586)                                |
| P7802-2    | Isomorph 2 of Transgelin-2 [OS=Homo sapiens]                                                    | Q8RIB8   | N-acetylneuraminate synthase OS=Fusobacterium nucleatum (strain ATCC 25586)                                    |
| P02794     | Ferritin heavy chain [OS=Homo sapiens]                                                          | Q8RFB6   | Outer membrane protein OS=Fusobacterium nucleatum (strain ATCC 25586)                                          |
| P55786     | nucleoside-sensitive aminopeptidase [OS=Homo sapiens]                                           | Q8RG53   | Uncharacterized protein OS=Fusobacterium nucleatum (strain ATCC 25586)                                         |
| P22090     | 40S ribosomal protein S4. Y isomorph 1 [OS=Homo sapiens]                                        | Q8RDW4   | Citrate lyase alpha chain OS=Fusobacterium nucleatum (strain ATCC 25586)                                       |
| A0A0A0MRZ2 | immunoglobulin kappa variable 3D-11 [OS=Homo sapiens]                                           | Q8RDX7   | Triosephosphate isomerase OS=Fusobacterium nucleatum (strain ATCC 25586)                                       |
| P19021-5   | Isomorph 5 of Peptidyl-glycine alpha-amidating monooxygenase [OS=Homo sapiens]                  | Q8R602   | Elongation factor G OS=Fusobacterium nucleatum subsp. nucleatum (strain ATCC 25586)                            |
| P25583     | High mobility group protein B2 [OS=Homo sapiens]                                                | Q8RIJ6   | Ion-translocating oxidoreductase complex subunit C OS=Fusobacterium nucleatum (strain ATCC 25586)              |
| Q8W13A-1   | Cell migration-inducing and hyaluronan-binding protein [OS=Homo sapiens]                        | Q8R643   | Uncharacterized protein OS=Fusobacterium nucleatum (strain ATCC 25586)                                         |
| Q8ELX7     | Ferritin family homolog 3 [OS=Homo sapiens]                                                     | Q8RE30   | DNA-binding protein HU OS=Fusobacterium nucleatum (strain ATCC 25586)                                          |
| P08567     | pleckstrin [OS=Homo sapiens]                                                                    | Q8RF56   | Threonine-tRNA ligase OS=Fusobacterium nucleatum (strain ATCC 25586)                                           |
| Q09497     | protein/mucic acid deglycase DJ-1 [OS=Homo sapiens]                                             | Q8RIN5   | (S)-2-hydroxy-acid oxidase chain D OS=Fusobacterium nucleatum (strain ATCC 25586)                              |
| P02452     | Collagen alpha-1(I) chain [OS=Homo sapiens]                                                     | Q8REM0   | Neutrophil-activating protein A OS=Fusobacterium nucleatum (strain ATCC 25586)                                 |
| Q0750-1    | Tissue-type plasminogen activator [OS=Homo sapiens]                                             | Q8RH15   | 50S ribosomal protein L7/L12 OS=Fusobacterium nucleatum (strain ATCC 25586)                                    |
| P03096-1   | Guanine nucleotide-binding protein G(s) subunit alpha-1 [OS=Homo sapiens]                       | Q8RI77   | V-type sodium ATP synthase subunit A OS=Fusobacterium nucleatum (strain ATCC 25586)                            |
| P02748     | complement component C9 [OS=Homo sapiens]                                                       | Q8RFC1   | Urocanate hydratase OS=Fusobacterium nucleatum (strain ATCC 25586)                                             |
| O15551     | Claudin-3 [OS=Homo sapiens]                                                                     | Q8RG89   | Glutaconate CoA-transferase subunit B OS=Fusobacterium nucleatum (strain ATCC 25586)                           |
| P14625     | Endoplasmic reticulum protein P2 [OS=Homo sapiens]                                              | Q8RI92   | Uncharacterized protein OS=Fusobacterium nucleatum (strain ATCC 25586)                                         |
| Q05387     | 60S acidic ribosomal protein P2 [OS=Homo sapiens]                                               | Q8R5Y8   | Biotin carboxyl carrier protein of glutaconyl-CoA decarboxylase OS=Fusobacterium nucleatum (strain ATCC 25586) |
| Q13867     | blebistatin hydrolase [OS=Homo sapiens]                                                         | Q8R6B3   | (R)-2-hydroxyglutaryl-CoA dehydratase beta-subunit OS=Fusobacterium nucleatum (strain ATCC 25586)              |
| P62316     | Small nuclear ribonucleoprotein Sm D2 [OS=Homo sapiens]                                         | Q8R674   | Acyl-CoA dehydrogenase OS=Fusobacterium nucleatum (strain ATCC 25586)                                          |
| Q09265     | Disco-interacting protein 2 homolog B [OS=Homo sapiens]                                         | Q8RII8   | Hypothetical cytosolic protein OS=Fusobacterium nucleatum (strain ATCC 25586)                                  |
| P01137     | Transforming growth factor beta 2 [OS=Homo sapiens]                                             | Q8RG80   | 50S ribosomal protein L19 OS=Fusobacterium nucleatum (strain ATCC 25586)                                       |
| Q8N1N4     | Keratin, type II cytoskeletal 78 [OS=Homo sapiens]                                              | Q8RFL4   | Transcriptional regulator, MarR family OS=Fusobacterium nucleatum (strain ATCC 25586)                          |
| P48509     | CD151 antigen [OS=Homo sapiens]                                                                 | Q8REMI   | Hypothetical exported 24-amino acid repeat protein OS=Fusobacterium nucleatum (strain ATCC 25586)              |
| Q05471     | Claudin-7 [OS=Homo sapiens]                                                                     | Q8RFW8   | Hypothetical cytosolic protein OS=Fusobacterium nucleatum (strain ATCC 25586)                                  |
| P06737-1   | Glycogen phosphorylase, liver form [OS=Homo sapiens]                                            | Q8R6B0   | Dipeptide-binding protein OS=Fusobacterium nucleatum (strain ATCC 25586)                                       |
| Q09N79     | Vacuolar protein sorting-associated protein VTA1 homolog [OS=Homo sapiens]                      | Q8RG90   | Flavodoxin OS=Fusobacterium nucleatum (strain ATCC 25586)                                                      |
| P61916     | Epididymal secretory protein E1 [OS=Homo sapiens]                                               | Q8RF61   | Imidazolonepropiolnase OS=Fusobacterium nucleatum (strain ATCC 25586)                                          |
| P25789     | Proteasome subunit alpha type-4 [OS=Homo sapiens]                                               | Q8RGE2   | ATP synthase subunit beta OS=Fusobacterium nucleatum (strain ATCC 25586)                                       |
| P07358     | Complement component C8 beta chain [OS=Homo sapiens]                                            | Q8RE17   | Outer membrane protein P1 OS=Fusobacterium nucleatum (strain ATCC 25586)                                       |
| Q08758     | annexin A5 [OS=Homo sapiens]                                                                    | Q8RDM5   | UPF0735 ACT domain-containing protein FN1487 OS=Fusobacterium nucleatum (strain ATCC 25586)                    |
| P03090     | Glutathione reductase, mitochondrial [OS=Homo sapiens]                                          | Q8RD14   | L-methionine gamma-lyase OS=Fusobacterium nucleatum (strain ATCC 25586)                                        |
| Q00796     | Sorbitol dehydrogenase [OS=Homo sapiens]                                                        | Q8RG65   | S-adenosylmethionine synthase OS=Fusobacterium nucleatum (strain ATCC 25586)                                   |
| Q8NG11-1   | Tetraspanin-14 [OS=Homo sapiens]                                                                | Q8RG46   | Flavodoxin OS=Fusobacterium nucleatum (strain ATCC 25586)                                                      |
| P05109     | Protein S100-A8 [OS=Homo sapiens]                                                               | Q8RH99   | Uncharacterized protein OS=Fusobacterium nucleatum (strain ATCC 25586)                                         |
| P01824     | immunoglobulin heavy variable 4-39 [OS=Homo sapiens]                                            | Q8RI54   | Pyruvate kinase OS=Fusobacterium nucleatum (strain ATCC 25586)                                                 |
| P11908-2   | Isomorph 2 of Ribose-phosphate pyrophosphokinase 2 [OS=Homo sapiens]                            | Q8RI74   | Peptide-binding protein OS=Fusobacterium nucleatum (strain ATCC 25586)                                         |
| P31689-1   | DnaI homolog subfamily A member 1 [OS=Homo sapiens]                                             | Q8RED6   | Phosphate acetyltransferase OS=Fusobacterium nucleatum (strain ATCC 25586)                                     |
| O14791-2   | Isomorph 2 of Apolipoprotein L1 [OS=Homo sapiens]                                               | Q8RH03   | Chaperone protein DnaJ OS=Fusobacterium nucleatum (strain ATCC 25586)                                          |
| Q8Q6E9-4   | Isomorph 4 of Serine incorporator 5 [OS=Homo sapiens]                                           | Q8RGL8   | Butyrate-acetoacetate CoA-transferase subunit B OS=Fusobacterium nucleatum (strain ATCC 25586)                 |
| Q9H0E2     | Toll-interacting protein [OS=Homo sapiens]                                                      | Q8RIN1   | Iron-sulfur cluster-binding protein OS=Fusobacterium nucleatum (strain ATCC 25586)                             |
| Q75487     | Glypican-4 [OS=Homo sapiens]                                                                    | Q8RDP7   | Pyridoxal 5'-phosphate synthase subunit PdxS OS=Fusobacterium nucleatum (strain ATCC 25586)                    |
| P36955     | Pigment epithelium-derived factor [OS=Homo sapiens]                                             | Q8RH43   | Fructose bisphosphate aldolase class I OS=Fusobacterium nucleatum (strain ATCC 25586)                          |
| P0DMED     | Protein SETSIP [OS=Homo sapiens]                                                                | Q8REG8   | Phosphonates-binding protein OS=Fusobacterium nucleatum (strain ATCC 25586)                                    |
| P20618     | proteasome subunit beta type-1 [OS=Homo sapiens]                                                | Q8RE27   | Uncharacterized protein OS=Fusobacterium nucleatum (strain ATCC 25586)                                         |
| P48059-3   | Isomorph 3 of LIM and senescent cell antigen-like-containing domain protein 1 [OS=Homo sapiens] | Q8RI68   | 50S ribosomal protein L5 OS=Fusobacterium nucleatum (strain ATCC 25586)                                        |
| Q0LUMF0    | intercellular adhesion molecule 5 [OS=Homo sapiens]                                             | Q8RHM6   | Tyrosine phenol-lyase OS=Fusobacterium nucleatum (strain ATCC 25586)                                           |
| Q06607     | Cytoplasmic FMRI-interacting protein 2 [OS=Homo sapiens]                                        | Q8RF60   | Glutamate formyltransferase OS=Fusobacterium nucleatum (strain ATCC 25586)                                     |
| P04088     | Coagulation factor XIII A chain [OS=Homo sapiens]                                               | Q8RH16   | DNA-directed RNA polymerase subunit beta OS=Fusobacterium nucleatum (strain ATCC 25586)                        |
| Q05497     | Partheninase [OS=Homo sapiens]                                                                  |          |                                                                                                                |
| P36551     | Oxygen-dependent coproporphyrinogen-III oxidase, mitochondrial [OS=Homo sapiens]                |          |                                                                                                                |
| Q09NZM1    | Myoferlin [OS=Homo sapiens]                                                                     |          |                                                                                                                |
| Q16787-2   | Laminin subunit alpha-3 [OS=Homo sapiens]                                                       |          |                                                                                                                |
| P33142-4   | Isomorph C of Fibulin-1 [OS=Homo sapiens]                                                       |          |                                                                                                                |
| Q05819-3   | Isomorph 3 of Mitogen-activated protein kinase kinase kinase 4 [OS=Homo sapiens]                |          |                                                                                                                |
| Q0H5V8-1   | CUB domain-containing protein 1 [OS=Homo sapiens]                                               |          |                                                                                                                |
| P13671     | Complement component c6 [OS=Homo sapiens]                                                       |          |                                                                                                                |

|             |                                                                                                 |  |  |
|-------------|-------------------------------------------------------------------------------------------------|--|--|
| O43240      | Kallikrein-10 [OS=Homo sapiens]                                                                 |  |  |
| Q13126-2    | Isoform 2 of 5-methyl-5-thiadenosine phosphorylase [OS=Homo sapiens]                            |  |  |
| P10643      | Coremiptin component C7 [OS=Homo sapiens]                                                       |  |  |
| P11234-2    | Isoform 2 of Ras-related protein Ral-B [OS=Homo sapiens]                                        |  |  |
| P07910-1    | Heterogeneous nuclear ribonucleoproteins C1/C2 [OS=Homo sapiens]                                |  |  |
| O95866-2    | Isoform A of Megakaryocyte and platelet inhibitory receptor G6b [OS=Homo sapiens]               |  |  |
| O55515-1    | Heterochromatin protein 1-binding protein 3 [OS=Homo sapiens]                                   |  |  |
| Q9UQ80      | proliferation-associated protein 2G4 [OS=Homo sapiens]                                          |  |  |
| P14678-3    | Isoform SM-B1 of Small nuclear ribonucleoprotein-associated proteins B and B' [OS=Homo sapiens] |  |  |
| Q01469      | Fatty acid-binding protein, epidermal [OS=Homo sapiens]                                         |  |  |
| P33229-1    | integrin alpha-6 [OS=Homo sapiens]                                                              |  |  |
| Q12841      | Follistatin-related protein 1 [OS=Homo sapiens]                                                 |  |  |
| Q86Y23      | Hormerin [OS=Homo sapiens]                                                                      |  |  |
| P63313      | thymosin beta-10 [OS=Homo sapiens]                                                              |  |  |
| Q15651-1    | High mobility group nucleosome-binding domain-containing protein 3 [OS=Homo sapiens]            |  |  |
| P61247      | 40S ribosomal protein S3a [OS=Homo sapiens]                                                     |  |  |
| P01780      | Immunoglobulin heavy variable 3-7 [OS=Homo sapiens]                                             |  |  |
| AA0A075B60  | immunoglobulin lambda variable 8-61 [OS=Homo sapiens]                                           |  |  |
| P35052      | Glypican-1 [OS=Homo sapiens]                                                                    |  |  |
| Q15758-1    | Neutral amino acid transporter B00 [OS=Homo sapiens]                                            |  |  |
| P32119      | Peroxiredoxin-2 [OS=Homo sapiens]                                                               |  |  |
| P61224-1    | Ras-related protein Rap-1b [OS=Homo sapiens]                                                    |  |  |
| P63000-2    | Isoform B of Ras-related C3 botulinum toxin substrate 1 [OS=Homo sapiens]                       |  |  |
| P12277      | Creatine kinase B-type [OS=Homo sapiens]                                                        |  |  |
| P61158      | actin-related protein 3 [OS=Homo sapiens]                                                       |  |  |
| AA0A0C4DH38 | immunoglobulin heavy variable 5-51 [OS=Homo sapiens]                                            |  |  |
| P05543      | dyroxine-binding globulin [OS=Homo sapiens]                                                     |  |  |
| P08697-1    | Alpha-2-antiplasmin [OS=Homo sapiens]                                                           |  |  |
| Q53H96      | Pyroline-5-carboxylate reductase 2 [OS=Homo sapiens]                                            |  |  |
| P25398      | 40S ribosomal protein S12 [OS=Homo sapiens]                                                     |  |  |
| P03950      | angiogenin [OS=Homo sapiens]                                                                    |  |  |
| P60981-1    | Dextrin [OS=Homo sapiens]                                                                       |  |  |
| O9NZN3      | EH domain-containing protein 3 [OS=Homo sapiens]                                                |  |  |
| P04062      | glucosylceramidase [OS=Homo sapiens]                                                            |  |  |
| P62888      | 60S ribosomal protein L30 [OS=Homo sapiens]                                                     |  |  |
| O95750      | Fibroblast growth factor 19 [OS=Homo sapiens]                                                   |  |  |
| P02304      | Non-histone chromosomal protein HMG-17 [OS=Homo sapiens]                                        |  |  |
| P55854-2    | Isoform 2 of Small ubiquitin-related modifier 3 [OS=Homo sapiens]                               |  |  |
| Q86XX4-2    | Isoform 2 of Extracellular matrix protein FRA1A [OS=Homo sapiens]                               |  |  |
| P15514      | Amphiregulin [OS=Homo sapiens]                                                                  |  |  |
| O94907      | Dickkopf-related protein 1 [OS=Homo sapiens]                                                    |  |  |
| P05164-3    | Isoform H7 of Myeloperoxidase [OS=Homo sapiens]                                                 |  |  |
| P17096-2    | Isoform HMG-Y of High mobility group protein HMG-I/HMG-Y [OS=Homo sapiens]                      |  |  |
| P38646      | Stress-70 protein, mitochondrial [OS=Homo sapiens]                                              |  |  |
| Q9Y376      | Calcium-binding protein 39 [OS=Homo sapiens]                                                    |  |  |
| P02461      | Collagen alpha-1(III) chain [OS=Homo sapiens]                                                   |  |  |
| Q8UIE6      | Histone H2A type 2-B [OS=Homo sapiens]                                                          |  |  |
| P14770      | Platelet glycoprotein IX [OS=Homo sapiens]                                                      |  |  |
| P36871-2    | Isoform 2 of Phosphotyrosinase-1 [OS=Homo sapiens]                                              |  |  |
| O75955      | Flotillin-1 [OS=Homo sapiens]                                                                   |  |  |
| Q14254      | Flotillin-2 [OS=Homo sapiens]                                                                   |  |  |
| O75954      | tetraspanin-9 [OS=Homo sapiens]                                                                 |  |  |
| Q641Q3      | Meteorin-like protein [OS=Homo sapiens]                                                         |  |  |
| Q02413      | Desmoglein-1 [OS=Homo sapiens]                                                                  |  |  |
| O9NZN4      | EH domain-containing protein 2 [OS=Homo sapiens]                                                |  |  |
| O9Y5K6      | CD2-associated protein [OS=Homo sapiens]                                                        |  |  |
| Q96DG6      | Carboxymethylglutaminylase homolog [OS=Homo sapiens]                                            |  |  |
| P40925-3    | Isoform 3 of Malate dehydrogenase, cytoplasmic [OS=Homo sapiens]                                |  |  |
| Q9P258      | Protein RCC2 [OS=Homo sapiens]                                                                  |  |  |
| Q92488-1    | acid sphingomyelinase-like phospholipase 3B [OS=Homo sapiens]                                   |  |  |
| P61313-1    | 60S ribosomal protein L15 [OS=Homo sapiens]                                                     |  |  |
| P22061-2    | Isoform 2 of Protein-L-isoaspartate(D-aspartate) O-methyltransferase [OS=Homo sapiens]          |  |  |
| P34932      | Heat shock 70 kDa protein 4 [OS=Homo sapiens]                                                   |  |  |
| P02545      | Prelamin-A/C [OS=Homo sapiens]                                                                  |  |  |
| Q9HH11-2    | Isoform 2 of Beta-parvin [OS=Homo sapiens]                                                      |  |  |
| P02826      | GTP-binding nuclear protein RAN [OS=Homo sapiens]                                               |  |  |
| Q43491-1    | band 4.1-like protein 2 [OS=Homo sapiens]                                                       |  |  |
| O00339-1    | Matrilin-2 [OS=Homo sapiens]                                                                    |  |  |
| Q9Y617-1    | phosphoserine aminotransferase [OS=Homo sapiens]                                                |  |  |
| P22626      | heterogeneous nuclear ribonucleoproteins A2/B1 [OS=Homo sapiens]                                |  |  |
| O60888-2    | Isoform A of Protein CuxA [OS=Homo sapiens]                                                     |  |  |
| P35244      | Replication protein A 14 kDa subunit [OS=Homo sapiens]                                          |  |  |
| P15151-1    | Poliiovirus receptor [OS=Homo sapiens]                                                          |  |  |
| P49588-2    | Isoform 2 of Alanine-tRNA ligase, cytoplasmic [OS=Homo sapiens]                                 |  |  |
| P37837      | Transaldolase [OS=Homo sapiens]                                                                 |  |  |
| AA0A0C4DH68 | immunoglobulin kappa variable 2-24 [OS=Homo sapiens]                                            |  |  |
| Q909K5      | Endogenous retrovirus group MER34 member 1 env polyprotein [OS=Homo sapiens]                    |  |  |
| Q14978-2    | Isoform Beta of Nuclear and coiled-body phosphoprotein 1 [OS=Homo sapiens]                      |  |  |
| P24592      | insulin-like growth factor-binding protein 6 [OS=Homo sapiens]                                  |  |  |
| O43278      | Kunitz-type protease inhibitor 1 [OS=Homo sapiens]                                              |  |  |
| P62318      | small nuclear ribonucleoprotein sm d3 [OS=Homo sapiens]                                         |  |  |
| Q9UBQ0-2    | Isoform 2 of Vacuolar protein sorting-associated protein 29 [OS=Homo sapiens]                   |  |  |
| Q9BWS9-2    | Isoform 2 of Chitinase domain-containing protein 1 [OS=Homo sapiens]                            |  |  |
| P62837      | ubiquitin-conjugating enzyme E2 D2 [OS=Homo sapiens]                                            |  |  |
| Q68E01      | Integrator complex subunit 3 [OS=Homo sapiens]                                                  |  |  |
| P81605      | Dermcidin [OS=Homo sapiens]                                                                     |  |  |
| Q96AG4      | Leucine-rich repeat-containing protein 59 [OS=Homo sapiens]                                     |  |  |
| P62280      | 40S ribosomal protein S11 [OS=Homo sapiens]                                                     |  |  |
| P62136-1    | scribbleless protein phosphatase FPL1 alpha catalytic subunit [OS=Homo sapiens]                 |  |  |
| Q9Y4L1      | Hypoxia up-regulated protein 1 [OS=Homo sapiens]                                                |  |  |
| O43488      | aflatoxin B1 aldehyde reductase member 2 [OS=Homo sapiens]                                      |  |  |
| AA0A0C4DH29 | Immunoglobulin heavy variable 1-3 [OS=Homo sapiens]                                             |  |  |
| P02730      | Band 3 anion transport protein [OS=Homo sapiens]                                                |  |  |
| P13798      | Acylamino-acid-releasing enzyme [OS=Homo sapiens]                                               |  |  |
| Q727W4      | ring finger CCH1-type antiviral protein 1 [OS=Homo sapiens]                                     |  |  |
| Q04917      | 14-3-3 protein eta [OS=Homo sapiens]                                                            |  |  |
| O75390      | citrate synthase, mitochondrial [OS=Homo sapiens]                                               |  |  |
| P08962      | CD63 antigen [OS=Homo sapiens]                                                                  |  |  |
| P50552      | Vasodilator-stimulated phosphoprotein [OS=Homo sapiens]                                         |  |  |
| Q00410-3    | Isoform 3 of Importin-5 [OS=Homo sapiens]                                                       |  |  |
| QH0C2       | ADP/ATP translocase 4 [OS=Homo sapiens]                                                         |  |  |
| P10114      | Ras-related protein Rap-2a [OS=Homo sapiens]                                                    |  |  |
| P00740      | Coagulation factor IX [OS=Homo sapiens]                                                         |  |  |
| Q9ULA0      | Aspartyl aminopeptidase [OS=Homo sapiens]                                                       |  |  |
| P11146      | Coronin-1A [OS=Homo sapiens]                                                                    |  |  |
| P55060-1    | Exportin-2 [OS=Homo sapiens]                                                                    |  |  |
| P15153      | Ras-related C3 botulinum toxin substrate 2 [OS=Homo sapiens]                                    |  |  |
| P09012      | U1 SMALL NUCLEAR RIBONUCLEOPROTEIN A [OS=Homo sapiens]                                          |  |  |
| P35573-1    | glycogen debranching enzyme [OS=Homo sapiens]                                                   |  |  |
| P53621-2    | Isoform 2 of Coatamer subunit alpha [OS=Homo sapiens]                                           |  |  |
| Q96J02      | E3 ubiquitin-protein ligase litchy homolog [OS=Homo sapiens]                                    |  |  |
| P02760      | Protein AMBP [OS=Homo sapiens]                                                                  |  |  |
| Q14515      | SPARC-like protein 1 [OS=Homo sapiens]                                                          |  |  |
| P40429      | 60S ribosomal protein L13a [OS=Homo sapiens]                                                    |  |  |
| P00749      | Urokinase-type plasminogen activator [OS=Homo sapiens]                                          |  |  |
| P27105      | erythrocyte band 7 integral membrane protein [OS=Homo sapiens]                                  |  |  |
| P10301      | Ras-related protein R-Ras [OS=Homo sapiens]                                                     |  |  |
| Q9NPH2      | Inositol 3-phosphate synthase 1 [OS=Homo sapiens]                                               |  |  |
| P03973      | Antileukoprotease [OS=Homo sapiens]                                                             |  |  |
| P01111      | GTPase NRas [OS=Homo sapiens]                                                                   |  |  |
| P61978-2    | Isoform 2 of Heterogeneous nuclear ribonucleoprotein K [OS=Homo sapiens]                        |  |  |
| O43252      | bifunctional 3'-phosphoadenosine 2'-phosphosulfate synthase 1 [OS=Homo sapiens]                 |  |  |
| P17990      | 26S proteasome regulatory subunit 6A [OS=Homo sapiens]                                          |  |  |
| Q9ZVX7      | F-box only protein 50 [OS=Homo sapiens]                                                         |  |  |
| Q9IHH0      | Rho-related GTP-binding protein RhoF [OS=Homo sapiens]                                          |  |  |
| P18124      | 60S ribosomal protein L7 [OS=Homo sapiens]                                                      |  |  |
| P46777      | 60S ribosomal protein L5 [OS=Homo sapiens]                                                      |  |  |
| Q9UNM6-2    | Isoform 2 of 26S proteasome non-ATPase regulatory subunit 13 [OS=Homo sapiens]                  |  |  |
| P60866-2    | Isoform 2 of 40S ribosomal protein S20 [OS=Homo sapiens]                                        |  |  |
| P49407-1    | Beta-arrestin-1 [OS=Homo sapiens]                                                               |  |  |
| O75347-2    | Isoform 2 of Tubulin-specific chaperone A [OS=Homo sapiens]                                     |  |  |
| P05386      | 60S acidic ribosomal protein P1 [OS=Homo sapiens]                                               |  |  |

|            |                                                                                     |  |  |
|------------|-------------------------------------------------------------------------------------|--|--|
| P01699     | Immunoglobulin lambda variable 1-44 [OS=Homo sapiens]                               |  |  |
| P21583-1   | Kit ligand [OS=Homo sapiens]                                                        |  |  |
| A0A0B4J1X5 | Immunoglobulin heavy variable 3-74 [OS=Homo sapiens]                                |  |  |
| Q6LXI9-6   | Isoform 6 of Nephronectin [OS=Homo sapiens]                                         |  |  |
| P11717     | Cation-independent mannose-6-phosphate receptor [OS=Homo sapiens]                   |  |  |
| Q9Y6C2     | EMILIN-1 [OS=Homo sapiens]                                                          |  |  |
| Q9LNN8     | Endothelial protein C receptor [OS=Homo sapiens]                                    |  |  |
| P05388     | 60S acidic ribosomal protein P0 [OS=Homo sapiens]                                   |  |  |
| P00533-1   | epidermal growth factor receptor [OS=Homo sapiens]                                  |  |  |
| Q9Y6W3     | Calpain-7 [OS=Homo sapiens]                                                         |  |  |
| Q9NZZ3     | Charged multivesicular body protein 5 [OS=Homo sapiens]                             |  |  |
| P14174     | Macrophage Migration inhibitory factor [OS=Homo sapiens]                            |  |  |
| P23396-2   | Isoform 2 of 40S ribosomal protein S3 [OS=Homo sapiens]                             |  |  |
| P38159-1   | RNA-binding motif protein, X chromosome [OS=Homo sapiens]                           |  |  |
| P07359     | Platelet glycoprotein Ib alpha chain [OS=Homo sapiens]                              |  |  |
| B5ME19     | eukaryotic translation initiation factor 3 subunit C-like protein [OS=Homo sapiens] |  |  |
| Q9UHL4     | Dipeptidyl peptidase 2 [OS=Homo sapiens]                                            |  |  |
| P50502     | Hsc70-interacting protein [OS=Homo sapiens]                                         |  |  |
| P62942     | Peptidyl-prolyl cis-trans isomerase FKBP1A [OS=Homo sapiens]                        |  |  |
| P41091     | eukaryotic translation initiation factor 2 subunit 3 [OS=Homo sapiens]              |  |  |
| P62079     | Tetraspanin-5 [OS=Homo sapiens]                                                     |  |  |
| P15169     | Carboxypeptidase N catalytic chain [OS=Homo sapiens]                                |  |  |
| Q9ULV4-3   | Isoform 3 of Coronin-1C [OS=Homo sapiens]                                           |  |  |
| P62249     | 40S ribosomal protein S16 [OS=Homo sapiens]                                         |  |  |
| Q04760-1   | lactoylcholine lyase [OS=Homo sapiens]                                              |  |  |
| Q9Y277-2   | Isoform 2 of Voltage-dependent anion-selective channel protein 3 [OS=Homo sapiens]  |  |  |

**Table S8** KEGG pathway analysis showed that these Fn-Ex unique cell proteins.

| pathway  | pathway_name                                    | class                                | diff_KO2acc                                                                                                                                                                                                                                                                                                                                                                                                                                                                                                                                                                                                                                                                                                                                                                                                                                                                              | p value  |
|----------|-------------------------------------------------|--------------------------------------|------------------------------------------------------------------------------------------------------------------------------------------------------------------------------------------------------------------------------------------------------------------------------------------------------------------------------------------------------------------------------------------------------------------------------------------------------------------------------------------------------------------------------------------------------------------------------------------------------------------------------------------------------------------------------------------------------------------------------------------------------------------------------------------------------------------------------------------------------------------------------------------|----------|
| hsa04062 | Ribosome                                        | Genetic Information Processing       | hsa:6159(P47914);hsa:6187(P15880);hsa:6230(P62851);hsa:100529097(P83881);hsa:6157(P46776);hsa:6154(P61254);hsa:6155(P61353);hsa:6234(P62857);hsa:6232(P42677);hsa:6173(P83881);hsa:6130(P62424);hsa:6134(P27635);hsa:51121(P61254);hsa:6194(P62753);hsa:6193(P46782);hsa:6227(P63220);hsa:6202(P62241);hsa:6166(P35268);hsa:6141(Q07020);hsa:6207(P62277);hsa:6143(P84098);hsa:6166(P83881);hsa:6208(P62263);hsa:6209(P62841);hsa:6161(P62910);hsa:6223(P39019);hsa:6122(P39023);hsa:6124(P36578);hsa:6128(Q02878);hsa:9045(P50914)                                                                                                                                                                                                                                                                                                                                                      | 1.53E-07 |
| hsa04810 | Chemokine signaling pathway                     | Organismal Systems                   | hsa:387(P61586);hsa:3576(P10145);hsa:58191(Q9H2A7)                                                                                                                                                                                                                                                                                                                                                                                                                                                                                                                                                                                                                                                                                                                                                                                                                                       | 0.055461 |
| hsa04150 | mTOR signaling pathway                          | Environmental Information Processing | hsa:6194(P62753);hsa:387(P61586);hsa:8140(Q01650)                                                                                                                                                                                                                                                                                                                                                                                                                                                                                                                                                                                                                                                                                                                                                                                                                                        | 0.062763 |
| hsa04810 | Regulation of actin cytoskeleton                | Cellular Processes                   | hsa:387(P61586)                                                                                                                                                                                                                                                                                                                                                                                                                                                                                                                                                                                                                                                                                                                                                                                                                                                                          | 0.062763 |
| hsa04270 | Vascular smooth muscle contraction              | Organismal Systems                   | hsa:140465(P14649);hsa:387(P61586);hsa:59(P62736);hsa:72(P62736)                                                                                                                                                                                                                                                                                                                                                                                                                                                                                                                                                                                                                                                                                                                                                                                                                         | 0.062763 |
| hsa05200 | Pathways in cancer                              | Human Diseases                       | hsa:387(P61586);hsa:3576(P10145)                                                                                                                                                                                                                                                                                                                                                                                                                                                                                                                                                                                                                                                                                                                                                                                                                                                         | 0.083066 |
| hsa04015 | Rap1 signaling pathway                          | Environmental Information Processing | hsa:387(P61586)                                                                                                                                                                                                                                                                                                                                                                                                                                                                                                                                                                                                                                                                                                                                                                                                                                                                          | 0.084432 |
| hsa05205 | Proteoglycans in cancer                         | Human Diseases                       | hsa:6194(P62753);hsa:387(P61586)                                                                                                                                                                                                                                                                                                                                                                                                                                                                                                                                                                                                                                                                                                                                                                                                                                                         | 0.116169 |
| hsa05150 | Staphylococcus aureus infection                 | Human Diseases                       | hsa:102723407(P0DOX6);hsa:3426(P05156);hsa:718(P01024);hsa:2266(P02679);hsa:728358(P59665);hsa:1668(P59665);hsa:1667(P59665)                                                                                                                                                                                                                                                                                                                                                                                                                                                                                                                                                                                                                                                                                                                                                             | 0.123359 |
| hsa04510 | Focal adhesion                                  | Cellular Processes                   | hsa:1311(P49747);hsa:387(P61586);hsa:7060(P35443)                                                                                                                                                                                                                                                                                                                                                                                                                                                                                                                                                                                                                                                                                                                                                                                                                                        | 0.138822 |
| hsa04610 | Complement and coagulation cascades             | Organismal Systems                   | hsa:718(P01024);hsa:2266(P02679);hsa:3426(P05156)                                                                                                                                                                                                                                                                                                                                                                                                                                                                                                                                                                                                                                                                                                                                                                                                                                        | 0.138822 |
| hsa05133 | Pertussis                                       | Human Diseases                       | hsa:718(P01024);hsa:387(P61586);hsa:3576(P10145)                                                                                                                                                                                                                                                                                                                                                                                                                                                                                                                                                                                                                                                                                                                                                                                                                                         | 0.15324  |
| hsa05161 | Hepatitis B                                     | Human Diseases                       | hsa:7529(P31946);hsa:3576(P10145);hsa:10971(P27348)                                                                                                                                                                                                                                                                                                                                                                                                                                                                                                                                                                                                                                                                                                                                                                                                                                      | 0.15324  |
| hsa04621 | NOD-like receptor signaling pathway             | Organismal Systems                   | hsa:1667(P59665);hsa:728358(P59665);hsa:387(P61586);hsa:1668(P59665);hsa:3576(P10145)                                                                                                                                                                                                                                                                                                                                                                                                                                                                                                                                                                                                                                                                                                                                                                                                    | 0.15324  |
| hsa04512 | ECM-receptor interaction                        | Environmental Information Processing | hsa:1311(P49747);hsa:7060(P35443)                                                                                                                                                                                                                                                                                                                                                                                                                                                                                                                                                                                                                                                                                                                                                                                                                                                        | 0.158097 |
| hsa05165 | Human papillomavirus infection                  | Human Diseases                       | hsa:1311(P49747);hsa:7060(P35443)                                                                                                                                                                                                                                                                                                                                                                                                                                                                                                                                                                                                                                                                                                                                                                                                                                                        | 0.158097 |
| hsa04371 | Apelin signaling pathway                        | Environmental Information Processing | hsa:6194(P62753);hsa:59(P62736)                                                                                                                                                                                                                                                                                                                                                                                                                                                                                                                                                                                                                                                                                                                                                                                                                                                          | 0.159481 |
| hsa05142 | Chagas disease (American trypanosomiasis)       | Human Diseases                       | hsa:718(P01024);hsa:3576(P10145)                                                                                                                                                                                                                                                                                                                                                                                                                                                                                                                                                                                                                                                                                                                                                                                                                                                         | 0.159481 |
| hsa04932 | Non-alcoholic fatty liver disease (NAFLD)       | Human Diseases                       | hsa:1965(P05198);hsa:3576(P10145)                                                                                                                                                                                                                                                                                                                                                                                                                                                                                                                                                                                                                                                                                                                                                                                                                                                        | 0.159481 |
| hsa04144 | Endocytosis                                     | Cellular Processes                   | hsa:10890(P61026);hsa:55048(A5D8V6);hsa:128866(Q9H444);hsa:160(Q95782);hsa:387(P61586)                                                                                                                                                                                                                                                                                                                                                                                                                                                                                                                                                                                                                                                                                                                                                                                                   | 0.169516 |
| hsa04151 | PI3K-Akt signaling pathway                      | Environmental Information Processing | hsa:102723407(P0DOX6);hsa:1311(P49747);hsa:7529(P31946);hsa:6194(P62753);hsa:7060(P35443);hsa:10971(P27348)                                                                                                                                                                                                                                                                                                                                                                                                                                                                                                                                                                                                                                                                                                                                                                              | 0.1703   |
| hsa05418 | Fluid shear stress and atherosclerosis          | Human Diseases                       | hsa:387(P61586)                                                                                                                                                                                                                                                                                                                                                                                                                                                                                                                                                                                                                                                                                                                                                                                                                                                                          | 0.183131 |
| hsa05202 | Transcriptional misregulation in cancer         | Human Diseases                       | hsa:102723407(P0DOX6);hsa:8358(P68431);hsa:653604(P68431);hsa:333932(P68431);hsa:3576(P10145);hsa:8352(P68431);hsa:8353(P68431);hsa:8350(P68431);hsa:8351(P68431);hsa:8356(P68431);hsa:8357(P68431);hsa:8354(P68431);hsa:8355(P68431);hsa:126961(P68431);hsa:1668(P59665);hsa:8968(P68431)                                                                                                                                                                                                                                                                                                                                                                                                                                                                                                                                                                                               | 0.196016 |
| hsa04915 | Estrogen signaling pathway                      | Organismal Systems                   | hsa:3861(P02533);hsa:3868(P08779);hsa:3875(P05783);hsa:3880(P08727)                                                                                                                                                                                                                                                                                                                                                                                                                                                                                                                                                                                                                                                                                                                                                                                                                      | 0.196016 |
| hsa05322 | Systemic lupus erythematosus                    | Human Diseases                       | hsa:102723407(P0DOX6);hsa:8358(P68431);hsa:8352(P68431);hsa:8353(P68431);hsa:8350(P68431);hsa:8351(P68431);hsa:8356(P68431);hsa:8357(P68431);hsa:8354(P68431);hsa:8355(P68431);hsa:126961(P68431);hsa:1668(P59665);hsa:8968(P68431);hsa:333932(P68431);hsa:126961(P68431);hsa:3012(P0C0S8;Q93077);hsa:8336(P0C0S8;Q93077);hsa:142(P09874);hsa:92815(Q93077);hsa:8329(P0C0S8;Q93077);hsa:128866(Q9H444);hsa:723790(P0C0S8;Q93077);hsa:3013(P0C0S8;Q93077);hsa:8330(P0C0S8;Q93077);hsa:8331(P0C0S8;Q93077);hsa:8332(P0C0S8;Q93077);hsa:8334(P0C0S8;Q93077);hsa:8335(P0C0S8;Q93077);hsa:8336(P0C0S8;Q93077);hsa:8337(P0C0S8;Q93077);hsa:8969(P0C0S8;Q93077);hsa:8968(P68431);hsa:723790(P0C0S8;Q93077);hsa:92815(Q93077);hsa:718(P01024);hsa:8329(P0C0S8;Q93077);hsa:653604(P68431);hsa:85235(P0C0S8;Q93077);hsa:333932(P68431);hsa:126961(P68431);hsa:3012(P0C0S8;Q93077);hsa:3013(P0C0S8) | 0.206168 |
| hsa05146 | Amoebiasis                                      | Human Diseases                       | hsa:102723407(P0DOX6);hsa:3576(P10145)                                                                                                                                                                                                                                                                                                                                                                                                                                                                                                                                                                                                                                                                                                                                                                                                                                                   | 0.208201 |
| hsa04611 | Platelet activation                             | Organismal Systems                   | hsa:2266(P02679);hsa:387(P61586)                                                                                                                                                                                                                                                                                                                                                                                                                                                                                                                                                                                                                                                                                                                                                                                                                                                         | 0.208201 |
| hsa04145 | Phagosome                                       | Cellular Processes                   | hsa:102723407(P0DOX6);hsa:1311(P49747);hsa:7060(P35443);hsa:718(P01024);hsa:7846(P68363);hsa:10376(P68363)                                                                                                                                                                                                                                                                                                                                                                                                                                                                                                                                                                                                                                                                                                                                                                               | 0.228841 |
| hsa04210 | Apoptosis                                       | Cellular Processes                   | hsa:7846(P68363);hsa:1965(P05198);hsa:142(P09874);hsa:10376(P68363)                                                                                                                                                                                                                                                                                                                                                                                                                                                                                                                                                                                                                                                                                                                                                                                                                      | 0.232865 |
| hsa04530 | Tight junction                                  | Cellular Processes                   | hsa:7846(P68363);hsa:140465(P14649);hsa:387(P61586);hsa:10376(P68363)                                                                                                                                                                                                                                                                                                                                                                                                                                                                                                                                                                                                                                                                                                                                                                                                                    | 0.232865 |
| hsa04072 | Phospholipase D signaling pathway               | Environmental Information Processing | hsa:102723407(P0DOX6);hsa:387(P61586);hsa:3576(P10145)                                                                                                                                                                                                                                                                                                                                                                                                                                                                                                                                                                                                                                                                                                                                                                                                                                   | 0.232865 |
| hsa04064 | NF-kappa B signaling pathway                    | Environmental Information Processing | hsa:102723407(P0DOX6);hsa:3576(P10145);hsa:142(P09874)                                                                                                                                                                                                                                                                                                                                                                                                                                                                                                                                                                                                                                                                                                                                                                                                                                   | 0.232865 |
| hsa05152 | Tuberculosis                                    | Human Diseases                       | hsa:718(P01024);hsa:387(P61586);hsa:102723407(P0DOX6)                                                                                                                                                                                                                                                                                                                                                                                                                                                                                                                                                                                                                                                                                                                                                                                                                                    | 0.232865 |
| hsa04217 | Necroptosis                                     | Cellular Processes                   | hsa:8969(P0C0S8;Q93077);hsa:3012(P0C0S8;Q93077);hsa:8336(P0C0S8;Q93077);hsa:142(P09874);hsa:92815(Q93077);hsa:8329(P0C0S8;Q93077);hsa:128866(Q9H444);hsa:723790(P0C0S8;Q93077);hsa:3013(P0C0S8;Q93077);hsa:8330(P0C0S8;Q93077);hsa:8331(P0C0S8;Q93077);hsa:8332(P0C0S8;Q93077);hsa:8334(P0C0S8;Q93077);hsa:8335(P0C0S8;Q93077);hsa:8336(P0C0S8;Q93077);hsa:8337(P0C0S8;Q93077);hsa:8969(P0C0S8;Q93077);hsa:8968(P68431);hsa:723790(P0C0S8;Q93077);hsa:92815(Q93077);hsa:8329(P0C0S8;Q93077);hsa:653604(P68431);hsa:85235(P0C0S8;Q93077);hsa:333932(P68431);hsa:126961(P68431);hsa:3012(P0C0S8;Q93077);hsa:3013(P0C0S8)                                                                                                                                                                                                                                                                   | 0.237833 |
| hsa04520 | Adherens junction                               | Cellular Processes                   | hsa:387(P61586)                                                                                                                                                                                                                                                                                                                                                                                                                                                                                                                                                                                                                                                                                                                                                                                                                                                                          | 0.25774  |
| hsa04066 | HIF-1 signaling pathway                         | Environmental Information Processing | hsa:6194(P62753)                                                                                                                                                                                                                                                                                                                                                                                                                                                                                                                                                                                                                                                                                                                                                                                                                                                                         | 0.25774  |
| hsa04141 | Protein processing in endoplasmic reticulum     | Genetic Information Processing       | hsa:1965(P05198)                                                                                                                                                                                                                                                                                                                                                                                                                                                                                                                                                                                                                                                                                                                                                                                                                                                                         | 0.25774  |
| hsa03013 | RNA transport                                   | Genetic Information Processing       | hsa:1965(P05198)                                                                                                                                                                                                                                                                                                                                                                                                                                                                                                                                                                                                                                                                                                                                                                                                                                                                         | 0.25774  |
| hsa05131 | Shigellosis                                     | Human Diseases                       | hsa:3576(P10145)                                                                                                                                                                                                                                                                                                                                                                                                                                                                                                                                                                                                                                                                                                                                                                                                                                                                         | 0.25774  |
| hsa04979 | Cholesterol metabolism                          | Organismal Systems                   | hsa:5360(P55058)                                                                                                                                                                                                                                                                                                                                                                                                                                                                                                                                                                                                                                                                                                                                                                                                                                                                         | 0.25774  |
| hsa04670 | Leukocyte transendothelial migration            | Organismal Systems                   | hsa:387(P61586)                                                                                                                                                                                                                                                                                                                                                                                                                                                                                                                                                                                                                                                                                                                                                                                                                                                                          | 0.25774  |
| hsa05203 | Viral carcinogenesis                            | Human Diseases                       | hsa:718(P01024);hsa:7529(P31946);hsa:387(P61586);hsa:10971(P27348)                                                                                                                                                                                                                                                                                                                                                                                                                                                                                                                                                                                                                                                                                                                                                                                                                       | 0.258583 |
| hsa05130 | Pathogenic Escherichia coli infection           | Human Diseases                       | hsa:7846(P68363);hsa:3875(P05783);hsa:387(P61586);hsa:10376(P68363);hsa:10971(P27348)                                                                                                                                                                                                                                                                                                                                                                                                                                                                                                                                                                                                                                                                                                                                                                                                    | 0.259166 |
| hsa04390 | Hippo signaling pathway                         | Environmental Information Processing | hsa:7529(P31946);hsa:10971(P27348)                                                                                                                                                                                                                                                                                                                                                                                                                                                                                                                                                                                                                                                                                                                                                                                                                                                       | 0.263175 |
| hsa05206 | MicroRNAs in cancer                             | Human Diseases                       | hsa:7431(P08670);hsa:387(P61586)                                                                                                                                                                                                                                                                                                                                                                                                                                                                                                                                                                                                                                                                                                                                                                                                                                                         | 0.263175 |
| hsa05034 | Alcoholism                                      | Human Diseases                       | hsa:8358(P68431);hsa:8352(P68431);hsa:8353(P68431);hsa:8350(P68431);hsa:8351(P68431);hsa:8356(P68431);hsa:8357(P68431);hsa:8354(P68431);hsa:8355(P68431);hsa:8330(P0C0S8;Q93077);hsa:8331(P0C0S8;Q93077);hsa:8332(P0C0S8;Q93077);hsa:8334(P0C0S8;Q93077);hsa:8335(P0C0S8;Q93077);hsa:8336(P0C0S8;Q93077);hsa:8337(P0C0S8;Q93077);hsa:8969(P0C0S8;Q93077);hsa:8968(P68431);hsa:723790(P0C0S8;Q93077);hsa:92815(Q93077);hsa:8329(P0C0S8;Q93077);hsa:653604(P68431);hsa:85235(P0C0S8;Q93077);hsa:333932(P68431);hsa:126961(P68431);hsa:3012(P0C0S8;Q93077);hsa:3013(P0C0S8)                                                                                                                                                                                                                                                                                                                 | 0.28189  |
| hsa05144 | Malaria                                         | Human Diseases                       | hsa:1311(P49747);hsa:3576(P10145);hsa:7060(P35443)                                                                                                                                                                                                                                                                                                                                                                                                                                                                                                                                                                                                                                                                                                                                                                                                                                       | 0.28189  |
| hsa05160 | Hepatitis C                                     | Human Diseases                       | hsa:7529(P31946);hsa:1965(P05198);hsa:10971(P27348)                                                                                                                                                                                                                                                                                                                                                                                                                                                                                                                                                                                                                                                                                                                                                                                                                                      | 0.28189  |
| hsa04110 | Cell cycle                                      | Cellular Processes                   | hsa:7529(P31946);hsa:10971(P27348)                                                                                                                                                                                                                                                                                                                                                                                                                                                                                                                                                                                                                                                                                                                                                                                                                                                       | 0.290152 |
| hsa04114 | Oocyte meiosis                                  | Cellular Processes                   | hsa:7529(P31946);hsa:10971(P27348)                                                                                                                                                                                                                                                                                                                                                                                                                                                                                                                                                                                                                                                                                                                                                                                                                                                       | 0.290152 |
| hsa04060 | Cytokine-cytokine receptor interaction          | Environmental Information Processing | hsa:58191(Q9H2A7);hsa:3576(P10145)                                                                                                                                                                                                                                                                                                                                                                                                                                                                                                                                                                                                                                                                                                                                                                                                                                                       | 0.290152 |
| hsa05323 | Rheumatoid arthritis                            | Human Diseases                       | hsa:102723407(P0DOX6);hsa:3576(P10145)                                                                                                                                                                                                                                                                                                                                                                                                                                                                                                                                                                                                                                                                                                                                                                                                                                                   | 0.290152 |
| hsa05140 | Leishmaniasis                                   | Human Diseases                       | hsa:718(P01024);hsa:102723407(P0DOX6)                                                                                                                                                                                                                                                                                                                                                                                                                                                                                                                                                                                                                                                                                                                                                                                                                                                    | 0.290152 |
| hsa05168 | Herpes simplex virus 1 infection                | Human Diseases                       | hsa:718(P01024);hsa:1965(P05198)                                                                                                                                                                                                                                                                                                                                                                                                                                                                                                                                                                                                                                                                                                                                                                                                                                                         | 0.290152 |
| hsa05135 | Yersinia infection                              | Human Diseases                       | hsa:387(P61586);hsa:3576(P10145)                                                                                                                                                                                                                                                                                                                                                                                                                                                                                                                                                                                                                                                                                                                                                                                                                                                         | 0.290152 |
| hsa05169 | Epstein-Barr virus infection                    | Human Diseases                       | hsa:102723407(P0DOX6);hsa:7431(P08670);hsa:5701(P35998)                                                                                                                                                                                                                                                                                                                                                                                                                                                                                                                                                                                                                                                                                                                                                                                                                                  | 0.297291 |
| hsa05134 | Legionellosis                                   | Human Diseases                       | hsa:718(P01024);hsa:3576(P10145)                                                                                                                                                                                                                                                                                                                                                                                                                                                                                                                                                                                                                                                                                                                                                                                                                                                         | 0.315393 |
| hsa04540 | Gap junction                                    | Cellular Processes                   | hsa:7846(P68363);hsa:10376(P68363)                                                                                                                                                                                                                                                                                                                                                                                                                                                                                                                                                                                                                                                                                                                                                                                                                                                       | 0.346675 |
| hsa05100 | Bacterial invasion of epithelial cells          | Human Diseases                       | hsa:387(P61586)                                                                                                                                                                                                                                                                                                                                                                                                                                                                                                                                                                                                                                                                                                                                                                                                                                                                          | 0.346675 |
| hsa05143 | African trypanosomiasis                         | Human Diseases                       | hsa:102723407(P0DOX6)                                                                                                                                                                                                                                                                                                                                                                                                                                                                                                                                                                                                                                                                                                                                                                                                                                                                    | 0.346675 |
| hsa05230 | Central carbon metabolism in cancer             | Human Diseases                       | hsa:8140(Q01650)                                                                                                                                                                                                                                                                                                                                                                                                                                                                                                                                                                                                                                                                                                                                                                                                                                                                         | 0.346675 |
| hsa03320 | PPAR signaling pathway                          | Organismal Systems                   | hsa:5360(P55058)                                                                                                                                                                                                                                                                                                                                                                                                                                                                                                                                                                                                                                                                                                                                                                                                                                                                         | 0.346675 |
| hsa04640 | Hamatopoietic cell lineage                      | Organismal Systems                   | hsa:102723407(P0DOX6)                                                                                                                                                                                                                                                                                                                                                                                                                                                                                                                                                                                                                                                                                                                                                                                                                                                                    | 0.346675 |
| hsa04666 | Fc gamma R-mediated phagocytosis                | Organismal Systems                   | hsa:102723407(P0DOX6)                                                                                                                                                                                                                                                                                                                                                                                                                                                                                                                                                                                                                                                                                                                                                                                                                                                                    | 0.346675 |
| hsa04310 | Wnt signaling pathway                           | Environmental Information Processing | hsa:8607(Q9Y265);hsa:387(P61586)                                                                                                                                                                                                                                                                                                                                                                                                                                                                                                                                                                                                                                                                                                                                                                                                                                                         | 0.350443 |
| hsa05163 | Human cytomegalovirus infection                 | Human Diseases                       | hsa:387(P61586);hsa:3576(P10145)                                                                                                                                                                                                                                                                                                                                                                                                                                                                                                                                                                                                                                                                                                                                                                                                                                                         | 0.350443 |
| hsa05164 | Influenza A                                     | Human Diseases                       | hsa:1965(P05198);hsa:3576(P10145)                                                                                                                                                                                                                                                                                                                                                                                                                                                                                                                                                                                                                                                                                                                                                                                                                                                        | 0.350443 |
| hsa05167 | Kaposi sarcoma-associated herpesvirus infection | Human Diseases                       | hsa:718(P01024);hsa:3576(P10145)                                                                                                                                                                                                                                                                                                                                                                                                                                                                                                                                                                                                                                                                                                                                                                                                                                                         | 0.350443 |

|          |                                                               |                                      |                                      |          |
|----------|---------------------------------------------------------------|--------------------------------------|--------------------------------------|----------|
| hsa04921 | Oxytocin signaling pathway                                    | Organismal Systems                   | hsa:140465(P14649);hsa:387(P61586)   | 0.350443 |
| hsa03050 | Proteasome                                                    | Genetic Information Processing       | hsa:5695(Q99436);hsa:5701(P35998)    | 0.351207 |
| hsa05414 | Dilated cardiomyopathy (DCM)                                  | Human Diseases                       | hsa:102723407(PODOX6);hsa:70(P62736) | 0.351207 |
| hsa04218 | Cellular senescence                                           | Cellular Processes                   | hsa:3576(P10145)                     | 0.401274 |
| hsa04071 | Sphingolipid signaling pathway                                | Environmental Information Processing | hsa:387(P61586)                      | 0.401274 |
| hsa04061 | Viral protein interaction with cytokine and cytokine receptor | Environmental Information Processing | hsa:3576(P10145)                     | 0.401274 |
| hsa04910 | Insulin signaling pathway                                     | Organismal Systems                   | hsa:6194(P62753)                     | 0.401274 |
| hsa04928 | Parathyroid hormone synthesis, secretion and action           | Organismal Systems                   | hsa:387(P61586)                      | 0.401274 |
| hsa04625 | C-type lectin receptor signaling pathway                      | Organismal Systems                   | hsa:387(P61586)                      | 0.401274 |
| hsa04620 | Toll-like receptor signaling pathway                          | Organismal Systems                   | hsa:3576(P10145)                     | 0.401274 |
| hsa04722 | Neurotrophin signaling pathway                                | Organismal Systems                   | hsa:387(P61586)                      | 0.401274 |
| hsa04614 | Renin-angiotensin system                                      | Organismal Systems                   | hsa:10159(O75787)                    | 0.401274 |
| hsa04721 | Synaptic vesicle cycle                                        | Organismal Systems                   | hsa:160(O95782)                      | 0.401274 |
| hsa04622 | RIG-I-like receptor signaling pathway                         | Organismal Systems                   | hsa:3576(P10145)                     | 0.401274 |
| hsa04660 | T cell receptor signaling pathway                             | Organismal Systems                   | hsa:387(P61586)                      | 0.401274 |
| hsa04014 | Ras signaling pathway                                         | Environmental Information Processing | hsa:387(P61586)                      | 0.435228 |
| hsa04080 | Neuroactive ligand-receptor interaction                       | Environmental Information Processing | hsa:718(P01024)                      | 0.435228 |
| hsa05416 | Viral myocarditis                                             | Human Diseases                       | hsa:102723407(PODOX6)                | 0.435228 |
| hsa04933 | AGE-RAGE signaling pathway in diabetic complications          | Human Diseases                       | hsa:3576(P10145)                     | 0.435228 |
| hsa05132 | Salmonella infection                                          | Human Diseases                       | hsa:3576(P10145)                     | 0.435228 |
| hsa05410 | Hypertrophic cardiomyopathy (HCM)                             | Human Diseases                       | hsa:70(P62736)                       | 0.435228 |
| hsa05210 | Colorectal cancer                                             | Human Diseases                       | hsa:387(P61586)                      | 0.435228 |
| hsa04360 | Axon guidance                                                 | Organismal Systems                   | hsa:387(P61586)                      | 0.435228 |
| hsa04657 | IL-17 signaling pathway                                       | Organismal Systems                   | hsa:3576(P10145)                     | 0.435228 |
| hsa04662 | B cell receptor signaling pathway                             | Organismal Systems                   | hsa:102723407(PODOX6)                | 0.435228 |
| hsa04926 | Relaxin signaling pathway                                     | Organismal Systems                   | hsa:59(P62736)                       | 0.435228 |
| hsa04714 | Thermogenesis                                                 | Organismal Systems                   | hsa:6194(P62753)                     | 0.435228 |
| hsa04140 | Autophagy - animal                                            | Cellular Processes                   | hsa:1965(P05198)                     | 0.483586 |
| hsa04152 | AMPK signaling pathway                                        | Environmental Information Processing | hsa:10890(P61026)                    | 0.483586 |
| hsa04020 | Calcium signaling pathway                                     | Environmental Information Processing | hsa:102723407(PODOX6)                | 0.483586 |
| hsa04350 | TGF-beta signaling pathway                                    | Environmental Information Processing | hsa:387(P61586)                      | 0.483586 |
| hsa04022 | cGMP-PKG signaling pathway                                    | Environmental Information Processing | hsa:387(P61586)                      | 0.483586 |
| hsa04024 | cAMP signaling pathway                                        | Environmental Information Processing | hsa:387(P61586)                      | 0.483586 |
| hsa03410 | Base excision repair                                          | Genetic Information Processing       | hsa:142(P09874)                      | 0.483586 |
| hsa05016 | Huntington disease                                            | Human Diseases                       | hsa:160(O95782)                      | 0.483586 |
| hsa05219 | Bladder cancer                                                | Human Diseases                       | hsa:3576(P10145)                     | 0.483586 |
| hsa05320 | Autoimmune thyroid disease                                    | Human Diseases                       | hsa:102723407(PODOX6)                | 0.483586 |
| hsa05340 | Primary immunodeficiency                                      | Human Diseases                       | hsa:102723407(PODOX6)                | 0.483586 |
| hsa05162 | Measles                                                       | Human Diseases                       | hsa:1965(P05198)                     | 0.483586 |
| hsa05330 | Allograft rejection                                           | Human Diseases                       | hsa:102723407(PODOX6)                | 0.483586 |
| hsa05120 | Epithelial cell signaling in Helicobacter pylori infection    | Human Diseases                       | hsa:3576(P10145)                     | 0.483586 |
| hsa05310 | Asthma                                                        | Human Diseases                       | hsa:102723407(PODOX6)                | 0.483586 |
| hsa04672 | Intestinal immune network for IgA production                  | Organismal Systems                   | hsa:102723407(PODOX6)                | 0.483586 |
| hsa04261 | Adrenergic signaling in cardiomyocytes                        | Organismal Systems                   | hsa:70(P62736)                       | 0.483586 |
| hsa04961 | Endocrine and other factor-regulated calcium reabsorption     | Organismal Systems                   | hsa:160(O95782)                      | 0.483586 |
| hsa04650 | Natural killer cell mediated cytotoxicity                     | Organismal Systems                   | hsa:102723407(PODOX6)                | 0.483586 |
| hsa04972 | Pancreatic secretion                                          | Organismal Systems                   | hsa:387(P61586)                      | 0.483586 |
| hsa04260 | Cardiac muscle contraction                                    | Organismal Systems                   | hsa:70(P62736)                       | 0.483586 |
| hsa04664 | Fc epsilon RI signaling pathway                               | Organismal Systems                   | hsa:102723407(PODOX6)                | 0.483586 |

**Table S9** The relationship between the fecal Fn abundance or serum exosomes miR-1246/92b-3p/27a-3p levels and the clinicopathological variables of the 82 CRC patients.

| Characteristics      | cases | <i>Fn</i> | <i>p</i> | miR-1246  | <i>p</i> | miR-92b-3p | <i>p</i> | miR-27a-3p | <i>p</i> | CXCL16      | <i>P</i> |
|----------------------|-------|-----------|----------|-----------|----------|------------|----------|------------|----------|-------------|----------|
|                      | (n)   | -log10    |          | -log10    |          | -log10     |          | -log10     |          | log10 pg/ml |          |
| <b>Gender</b>        |       |           | 0.51     |           | 0.46     |            | 0.16     |            | 0.3      |             | 0.4      |
| Male                 | 54    | 4.44±1.31 |          | 3.18±1.32 |          | 3.59±1.29  |          | 4.47±0.75  |          | 1.71±0.79   |          |
| Female               | 28    | 4.23±1.54 |          | 3.39±0.97 |          | 3.14±1.46  |          | 4.30±0.69  |          | 1.55±0.78   |          |
| <b>Age(y)</b>        |       |           | 0.34     |           | 0.97     |            | 0.69     |            | 0.22     |             | 0.33     |
| <60                  | 43    | 4.30±1.40 |          | 3.25±1.20 |          | 3.50±1.47  |          | 4.32±0.70  |          | 1.73±0.79   |          |
| ≥60                  | 39    | 4.52±1.37 |          | 3.26±1.25 |          | 3.37±1.25  |          | 4.52±0.77  |          | 1.56±0.79   |          |
| <b>Location</b>      |       |           | 0.66     |           | 0.95     |            | 0.58     |            | 0.95     |             | 0.67     |
| Colon                | 53    | 4.32±1.39 |          | 3.24±1.27 |          | 3.50±1.40  |          | 4.41±0.68  |          | 1.68±0.76   |          |
| Rectal               | 29    | 4.46±1.38 |          | 3.26±1.13 |          | 5.32±1.30  |          | 4.42±0.81  |          | 1.60±0.85   |          |
| <b>Stage</b>         |       |           | 0.11     |           | 0.59     |            | 0.1      |            | 0.04     |             | 0.45     |
| I + II               | 45    | 4.59±1.49 |          | 3.32±1.16 |          | 3.21±1.30  |          | 4.57±23.93 |          | 1.59±0.80   |          |
| III+IV               | 37    | 4.10±1.20 |          | 3.20±1.28 |          | 3.70±1.40  |          | 4.23±20.81 |          | 1.73±0.78   |          |
| <b>T status</b>      |       |           | 0.92     |           | 0.26     |            | 0.71     |            | 0.62     |             | 0.09     |
| T1+T2                | 13    | 4.33±1.77 |          | 3.48±0.65 |          | 3.31±1.26  |          | 4.51±0.58  |          | 1.32±0.76   |          |
| T3+T4                | 69    | 4.38±1.31 |          | 3.21±1.29 |          | 3.46±1.39  |          | 4.40±0.76  |          | 1.72±0.78   |          |
| <b>N status</b>      |       |           | 0.13     |           | 0.6      |            | 0.09     |            | 0.43     |             | 0.73     |
| No                   | 44    | 4.58±1.51 |          | 3.32±1.18 |          | 3.20±1.31  |          | 4.56±0.71  |          | 1.68±0.68   |          |
| Yes                  | 38    | 4.12±1.19 |          | 3.18±1.27 |          | 3.71±1.38  |          | 4.24±0.73  |          | 1.62±0.73   |          |
| <b>Metastasis</b>    |       |           | 0.72     |           | 0.47     |            | 0.17     |            | 0.62     |             | 0.006    |
| No                   | 66    | 4.40±1.46 |          | 3.30±1.21 |          | 3.34±1.33  |          | 4.43±0.72  |          | 1.54±0.71   |          |
| Yes                  | 16    | 4.26±1.06 |          | 3.05±1.23 |          | 3.86±1.44  |          | 4.33±0.79  |          | 2.13±0.94   |          |
| <b>CEA (µg/ml)</b>   |       |           | 0.21     |           | 0.24     |            | 0.59     |            | 0.88     |             | 0.07     |
| <5                   | 53    | 4.22±1.30 |          | 3.37±1.07 |          | 3.50±1.36  |          | 4.40±0.72  |          | 1.54±0.83   |          |
| ≥5                   | 29    | 4.63±1.52 |          | 3.04±1.43 |          | 3.33±1.38  |          | 4.43±0.77  |          | 1.87±0.71   |          |
| <b>CA19-9 (U/ml)</b> |       |           | 0.34     |           | 0.4      |            | 0.85     |            | 0.17     |             | 0.72     |
| <35                  | 69    | 6.31±1.40 |          | 3.20±1.23 |          | 3.42±1.30  |          | 4.36±0.40  |          | 1.64±0.77   |          |
| ≥35                  | 13    | 4.70±1.29 |          | 3.51±1.09 |          | 3.50±1.72  |          | 4.67±0.65  |          | 1.73±0.69   |          |
| <b>gFOBT</b>         |       |           | 0.62     |           | 0.95     |            | 0.19     |            | 0.76     |             | 0.65     |
| Positive             | 8     | 4.05±1.26 |          | 3.38±1.39 |          | 4.05±1.24  |          | 4.23±0.68  |          | 1.86±0.54   |          |
| Weakly positive      | 12    | 4.14±1.44 |          | 3.21±1.42 |          | 2.93±1.15  |          | 4.46±0.81  |          | 1.64±0.69   |          |
| Negative             | 62    | 4.45±1.40 |          | 3.24±1.17 |          | 3.46±1.39  |          | 4.43±0.73  |          | 1.63±0.70   |          |

**Supplementary Figure**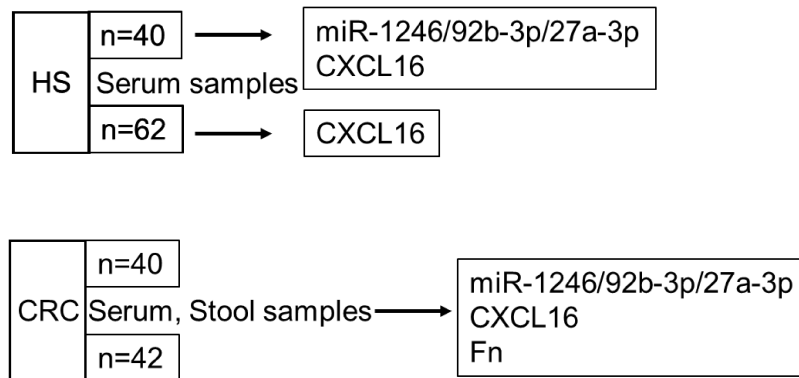**Figure S1 Background grouping of the study cohorts.**



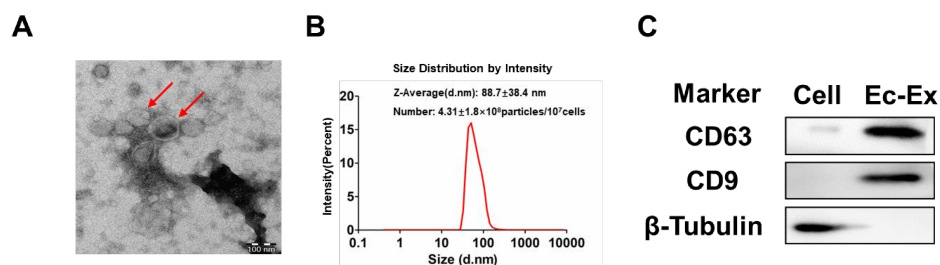

**Figure S2 Identification of exosomes derived from *E.coli*-infected HCT116 cell (Ec -Ex).** HCT116 cell were infected with live *E.coli* at an MOI of 1:1000 (bacteria: cells) and then were cultured for 24 h. **(A)** TEM images of purified Ec-Ex. Scale bar = 100 nm. **(B)** Nanoparticle tracking analysis (NTA) analysis of size distribution. **(C)** Western blot analysis of markers (CD63 and CD9) in exosomal protein purified from *E.coli*-infected HCT116 cell supernatants, tubulin served as an internal control in whole-cell lysates.



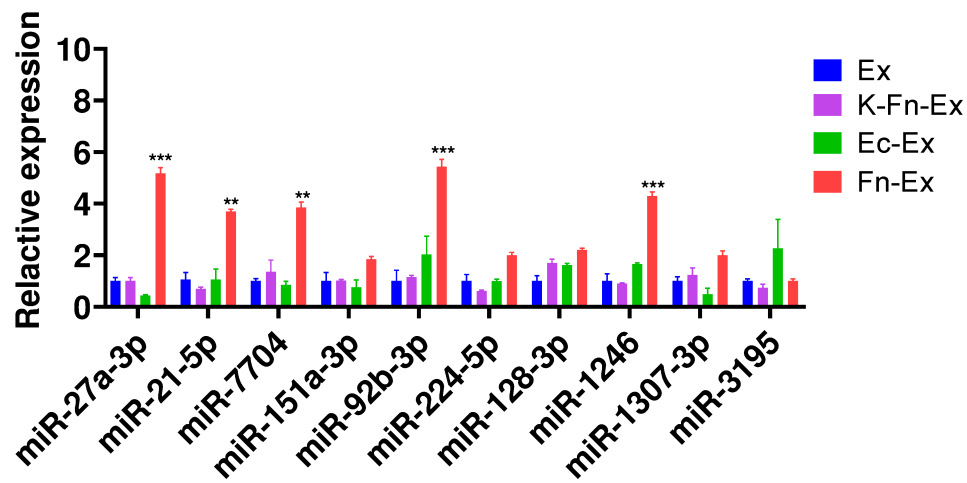

**Figure S3** Screen and identification the results of RNA sequence in exosome from HCT116 cells (Ex), *E.coli*-infected HCT116 cells (Ec-Ex), Fn-infected HCT116 cells (Fn-Ex), and heat-killed Fn-infected HCT116 cells (K-Fn-Ex). Quantitative real-time PCR indicating relative expression of selected miRNA in Ex, K-Fn-Ex, Ec-Ex and Fn-Ex. Error bars, SD. \*\*,  $P < 0.01$ ; \*\*\*,  $P < 0.001$ .

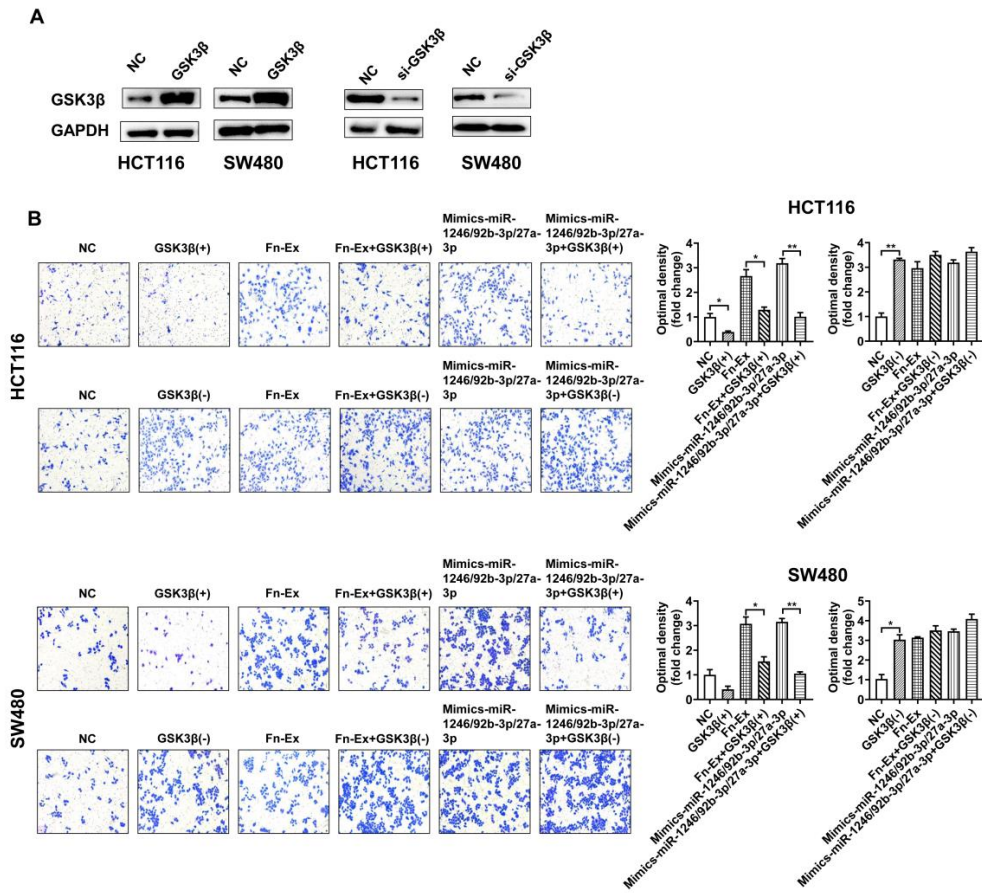

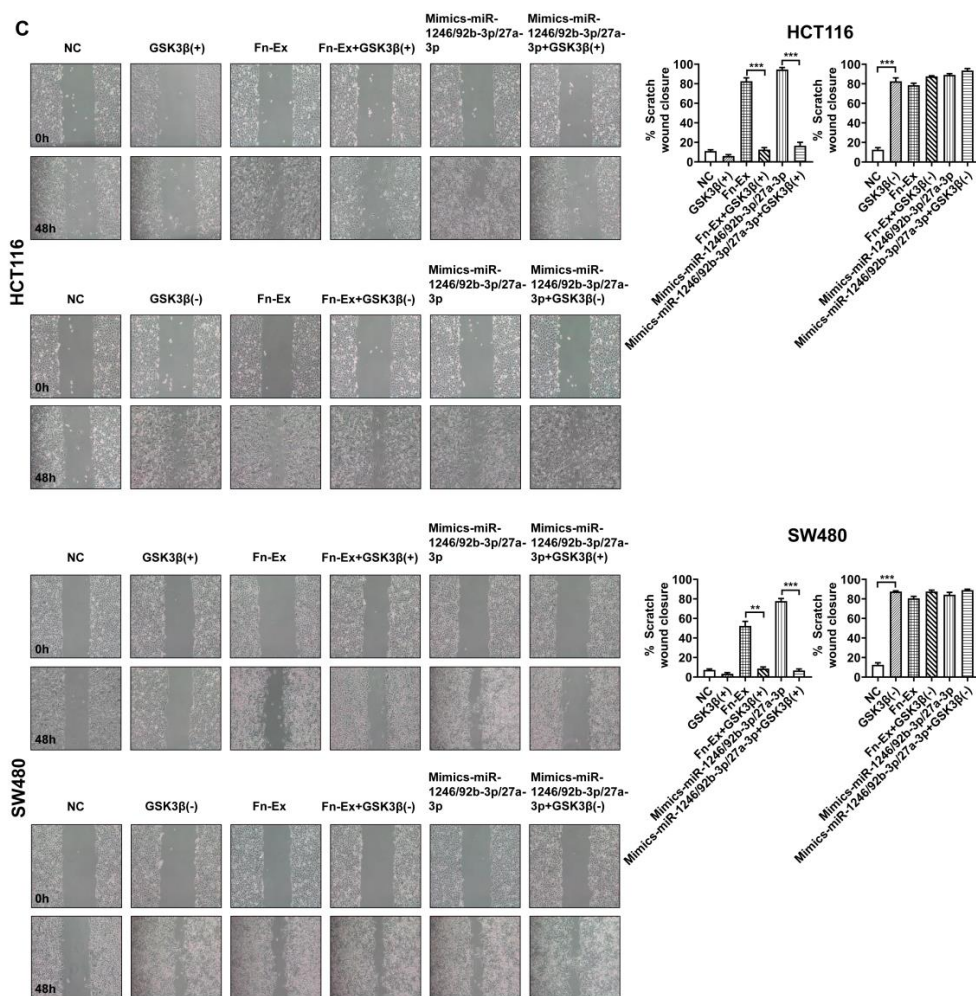

**Figure S4 miR-1246/92b-3p/27a-3p of Fn-Ex to promote CRC cells migration through inhibition of GSK3 $\beta$ .** (A) Expression of GSK3 $\beta$  in HCT116 and SW480 cells after transfection with GSK3 $\beta$  overexpression plasmid GSK3 $\beta$ (+) or siRNAs GSK3 $\beta$ (-). (B) The migration of CRC cells was assessed using a Transwell migration assays. Representative images of the assay (right). (C) Analysis of CRC cells migration by *in vitro* scratch assays. Images were acquired at 0 and 48 h. Right quantitative analysis of scratch wound closure. Data represent at least three experiments performed in triplicate. Scale bar = 200  $\mu$ m; Error bars, SD. \*\*,  $P < 0.01$ ; and \*\*\*,  $P < 0.001$ .

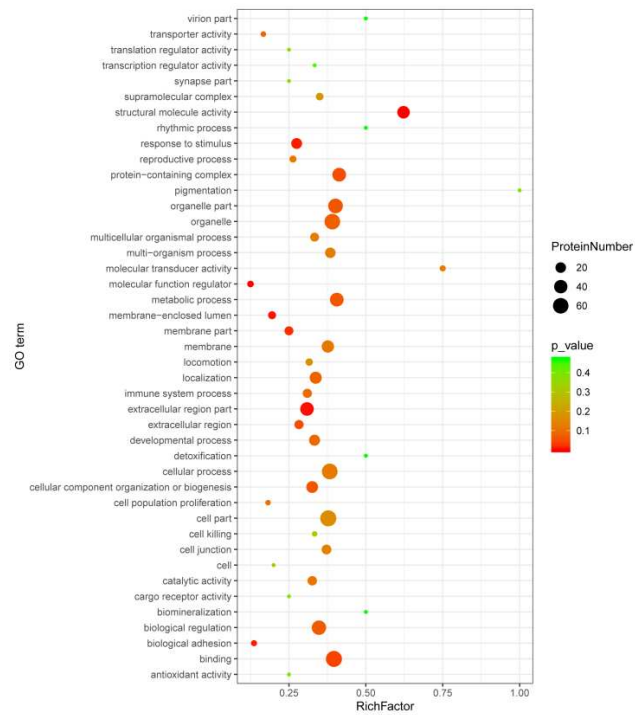

**Figure S5 Gene ontology (GO) enrichment analysis of the Fn-infected HCT116 cells derived exosomes (Fn-Ex) unique cell proteins.**

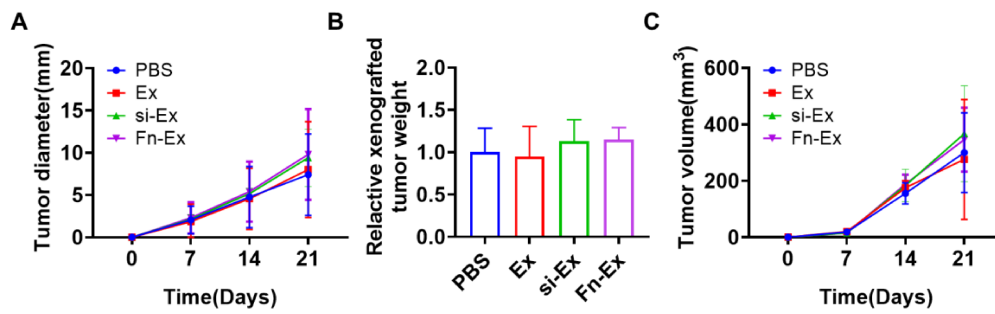

**Figure S6** *In vivo* verification shows that Fn-Ex promotes migration. Quantitative analysis of xenografted tumor diameter (A), weight (B), and volume (C) (n = 5). Error bars, SD.
